# Supplementary material for: Establishment and genomic characterization of a sporadic malignant peripheral nerve sheath tumor cell line
Source: PubMed Central journal article supplement (PMC7952412; doi:10.1038/s41598-021-85055-2), 2021-03-11

## Supplemental Materials

### **Establishment and genomic characterization of a sporadic malignant peripheral nerve sheath tumor cell line**

Jody Fromm Longo<sup>1</sup>, Stephanie N. Brosius<sup>3,5\*</sup>, Iya Znoyko<sup>1</sup>, Victoria A. Alers<sup>1</sup>, Dorea P. Jenkins<sup>1</sup>, Robert C. Wilson<sup>1,2</sup>, Andrew J. Carroll<sup>4</sup>, Dayna J. Wolff<sup>1</sup>, Kevin A. Roth<sup>6</sup> and Steven L. Carroll<sup>1,2,3\*\*</sup>

Departments of Pathology and Laboratory Medicine<sup>1</sup> and the Center for Genomic Medicine<sup>2</sup>,  
Medical University of South Carolina, Charleston, SC 29425-9080

Departments of Pathology<sup>3</sup> and Genetics<sup>4</sup> and the Medical Scientist Training Program<sup>5</sup>,  
University of Alabama at Birmingham, Birmingham, AL 35294-0017

Department of Pathology and Cell Biology<sup>6</sup>, Vagelos College of Physicians and Surgeons,  
Columbia University, New York, NY 10032

## Supplemental Figure S1

### RNA Sequencing analysis

| <b>Name</b> | <b>/gene_synonym</b>                                                 | <b>2XSB<br/>RPKM</b> | <b>Tumor<br/>RPKM</b> |
|-------------|----------------------------------------------------------------------|----------------------|-----------------------|
| MLANA       | MART-1, MART1                                                        | 0.251                | 0.07                  |
| PMEL        | D12S53E, gp100, ME20, ME20-M, ME20M, P1, P100, PMEL17, SI, SIL, SILV | 0.18                 | 0.653                 |
| TERT        | CMM9, DKCA2, DKCB4, EST2, hEST2, hTRT, PFBMFT1, TCS1, TP2, TRT       | 0.197                | 0.125                 |

# Supplemental Figure S2

## 3D Culture of Giant only cells

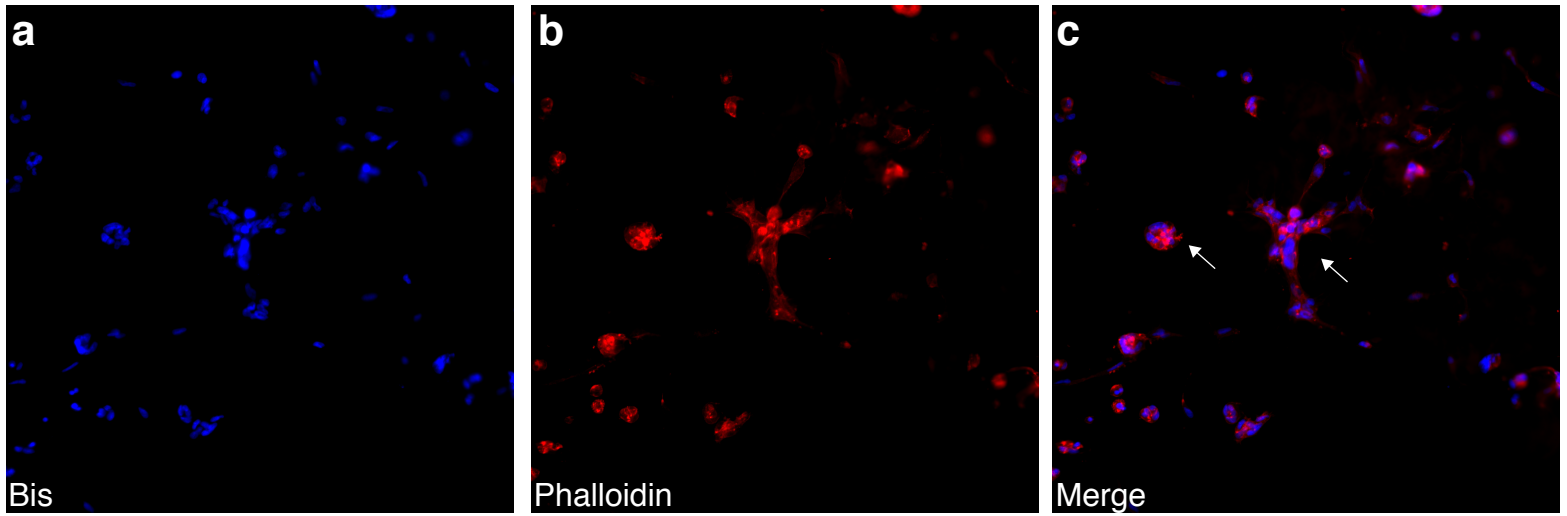

## d Xenograft Growth Measurements

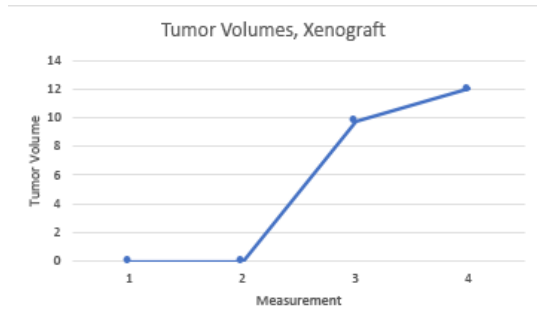

**a** Tumor

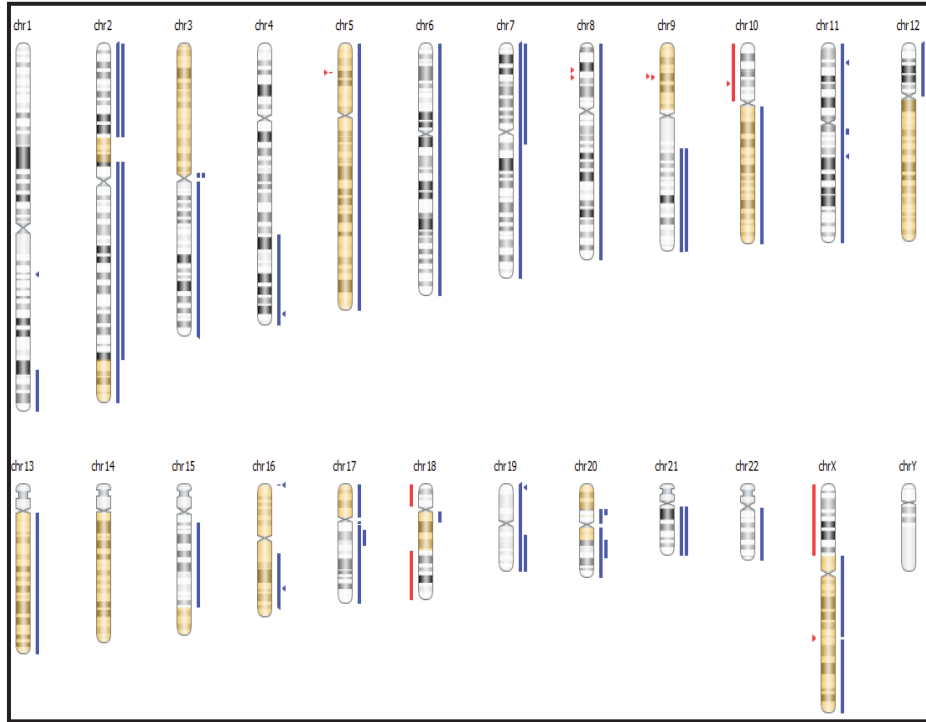

**b** Cell Line

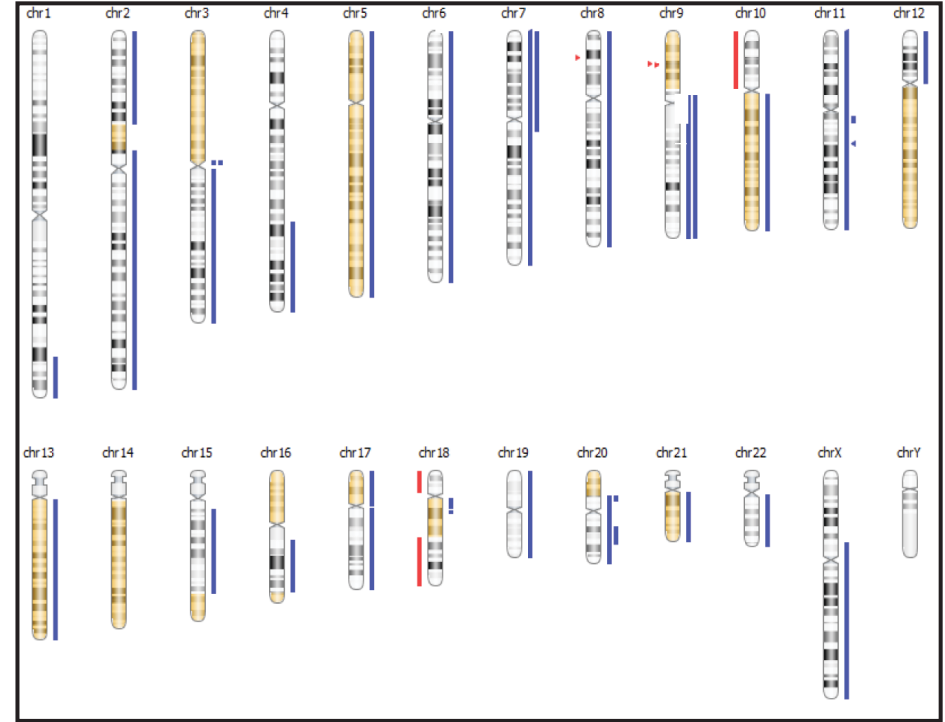

# Supplemental Figure S4

## a Tumor

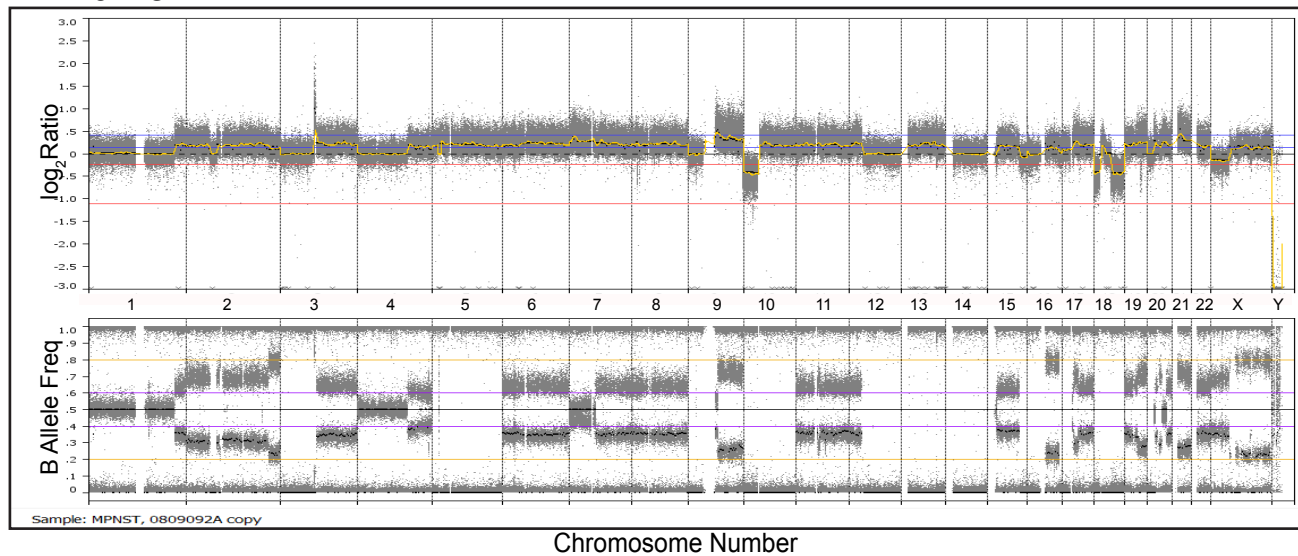

## b Cell Line

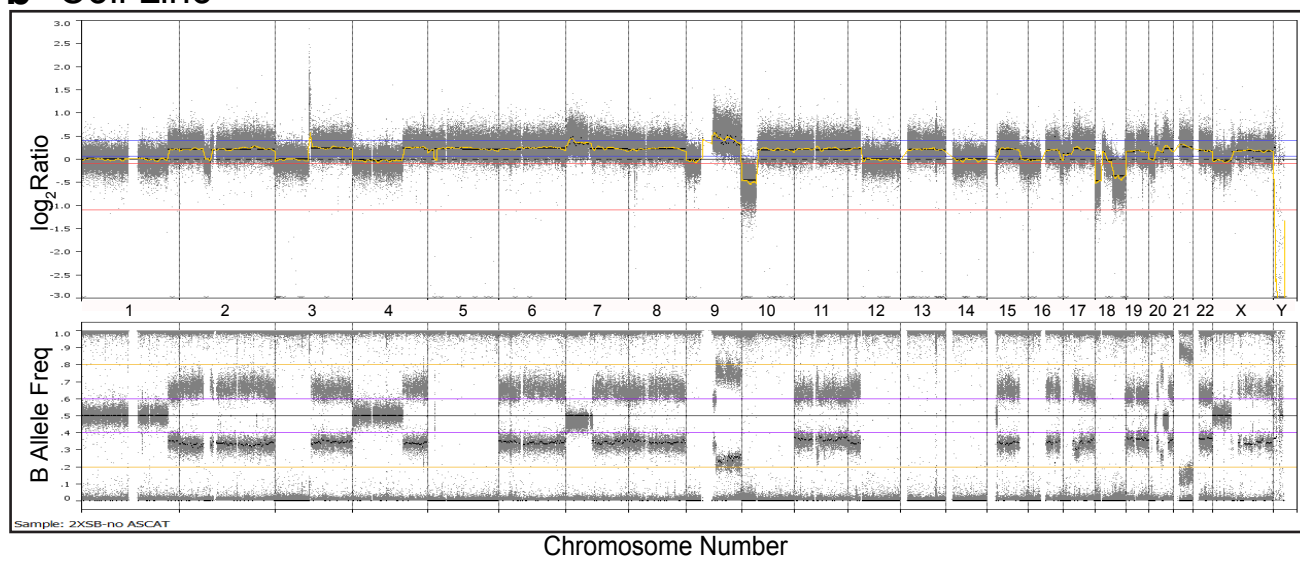

Supplemental Figure S5

**a NF1 (tumor)**

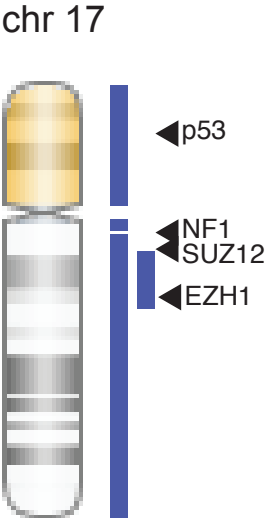

**b CDKN2A (tumor)**

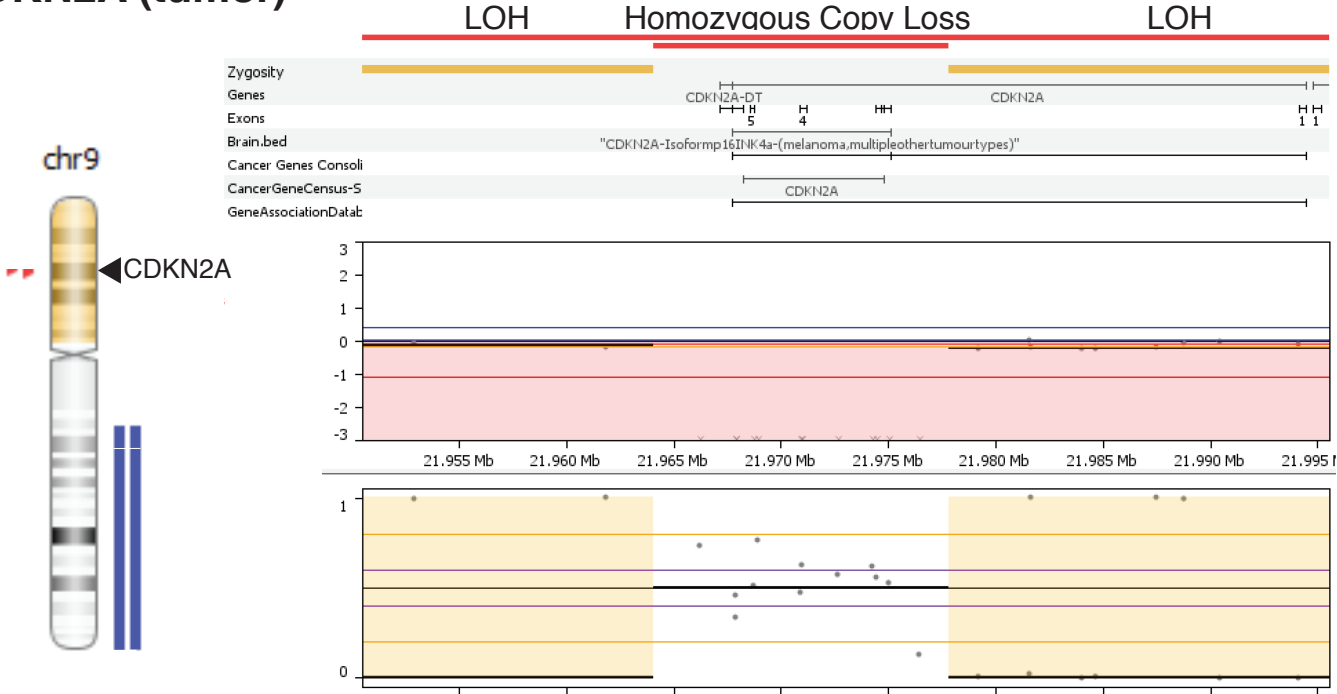

Supplemental Figure S6

326 Variants in  
Bushman Genes or  
Known MPNST Genes

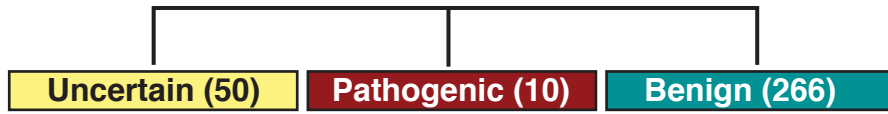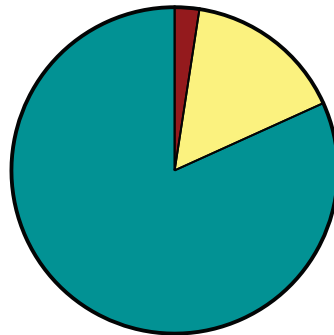

3.1% Pathogenic  
15.3% Uncertain  
81.6% Benign

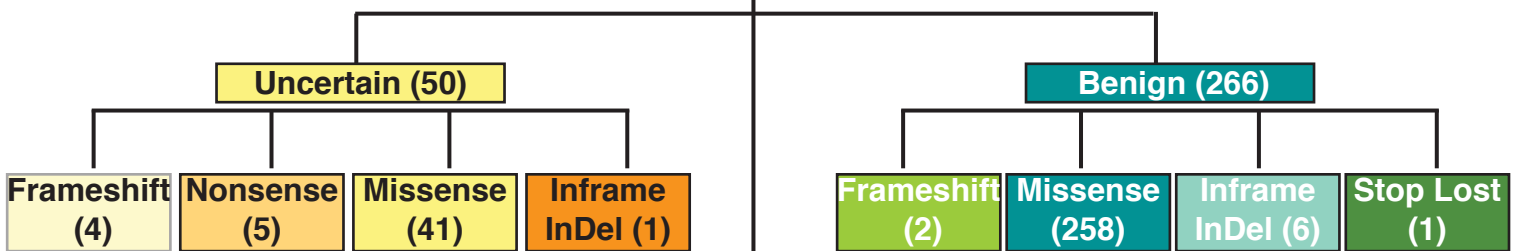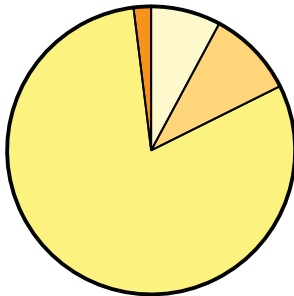

7.8% Frameshift  
9.8% Nonsense  
80.4% Missense  
2.0% Inframe InDel

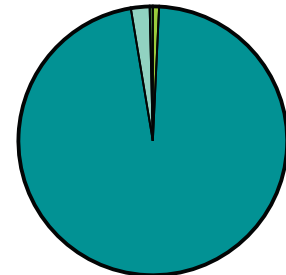

0.75% Frameshift  
96.3% Missense  
2.25% Inframe InDel  
0.37% Stop Lost

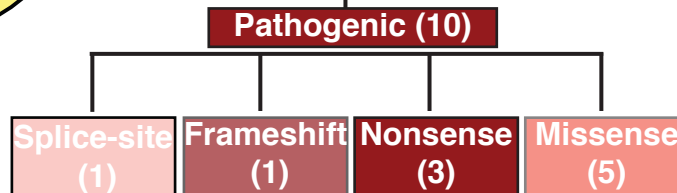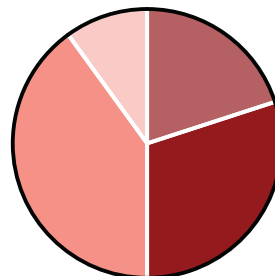

10.0% Frameshift  
30.0% Nonsense  
50.0% Missense  
10.0% Splice-site

# Supplemental Figure S7

## WES assembly output: TP53, p.H178D

### Tumor:

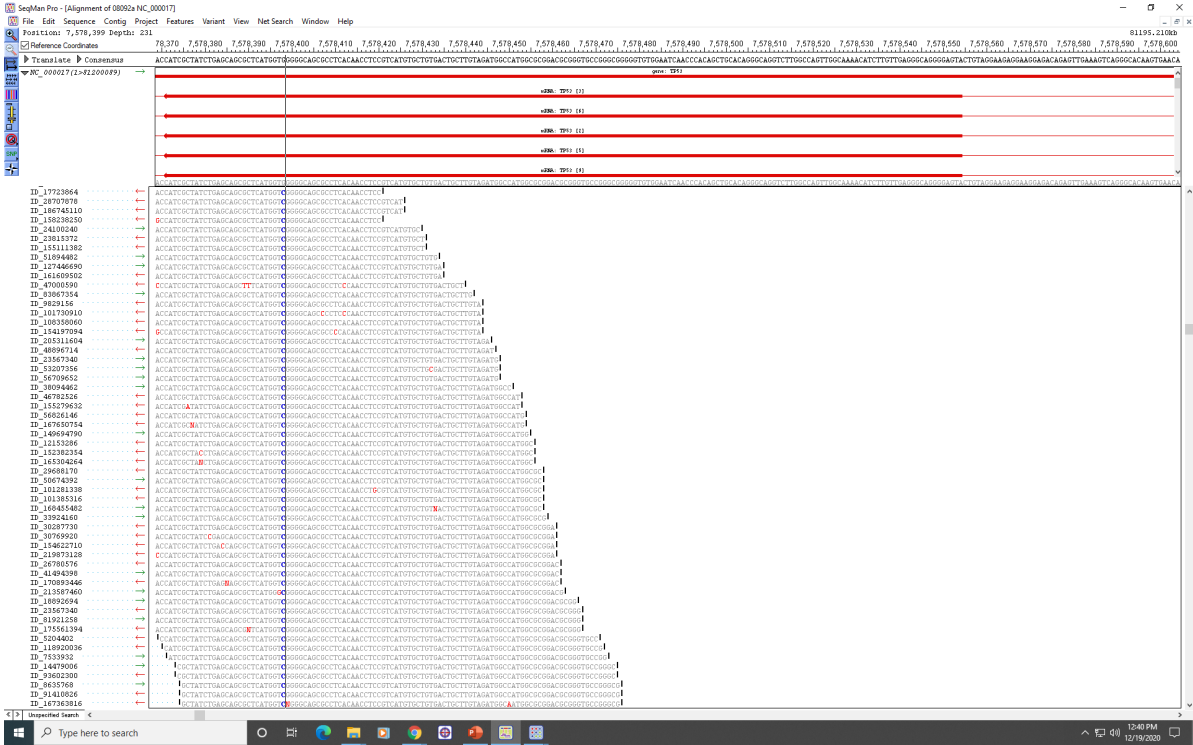

### Cell line:

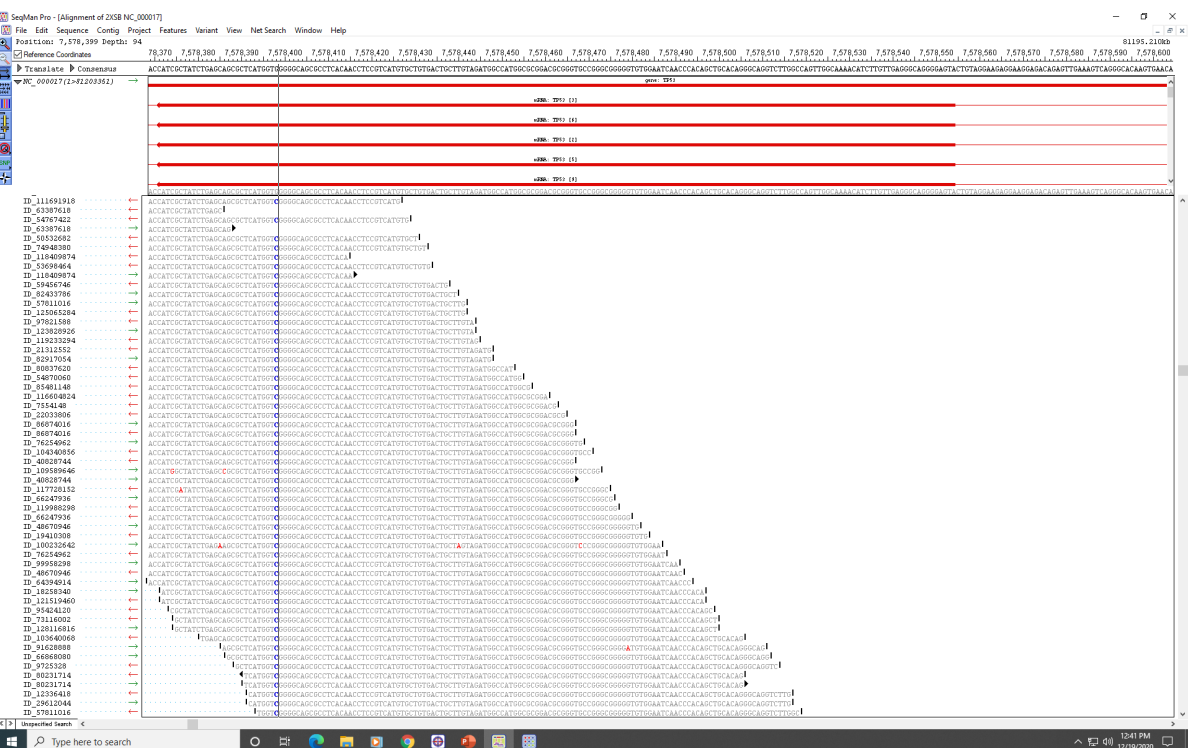





# Supplemental Figure S7

## WES assembly output: DNMT1, c.2586+1 G>A

### Tumor:

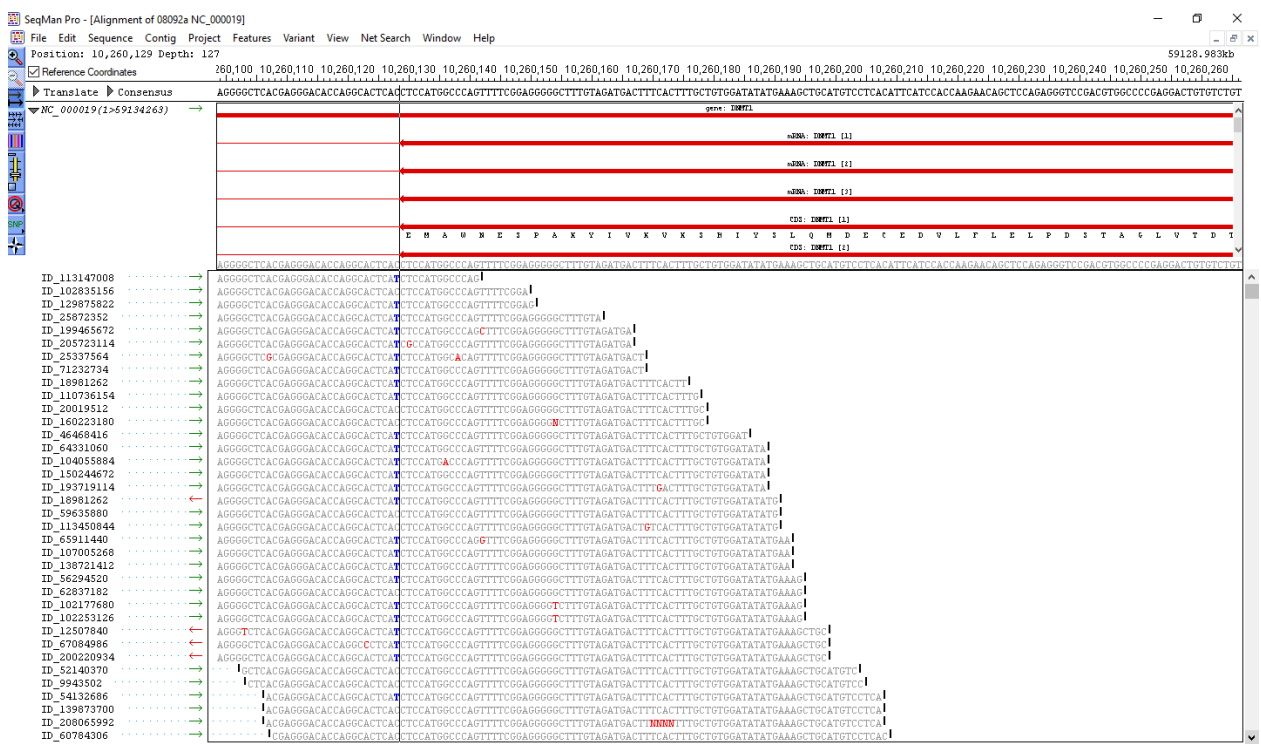

### Cell line:

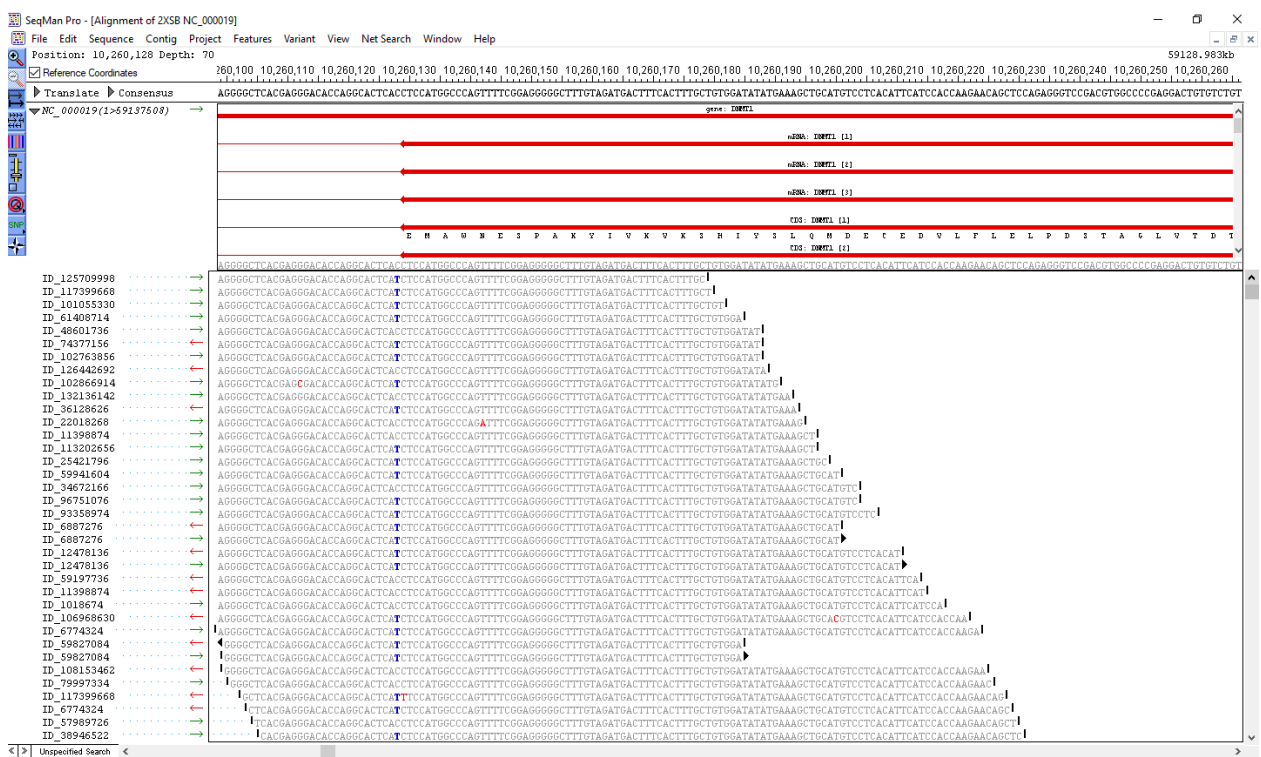

# Supplemental Figure S7

## WES assembly output: NUMA1, p.L1167fs

### Tumor:

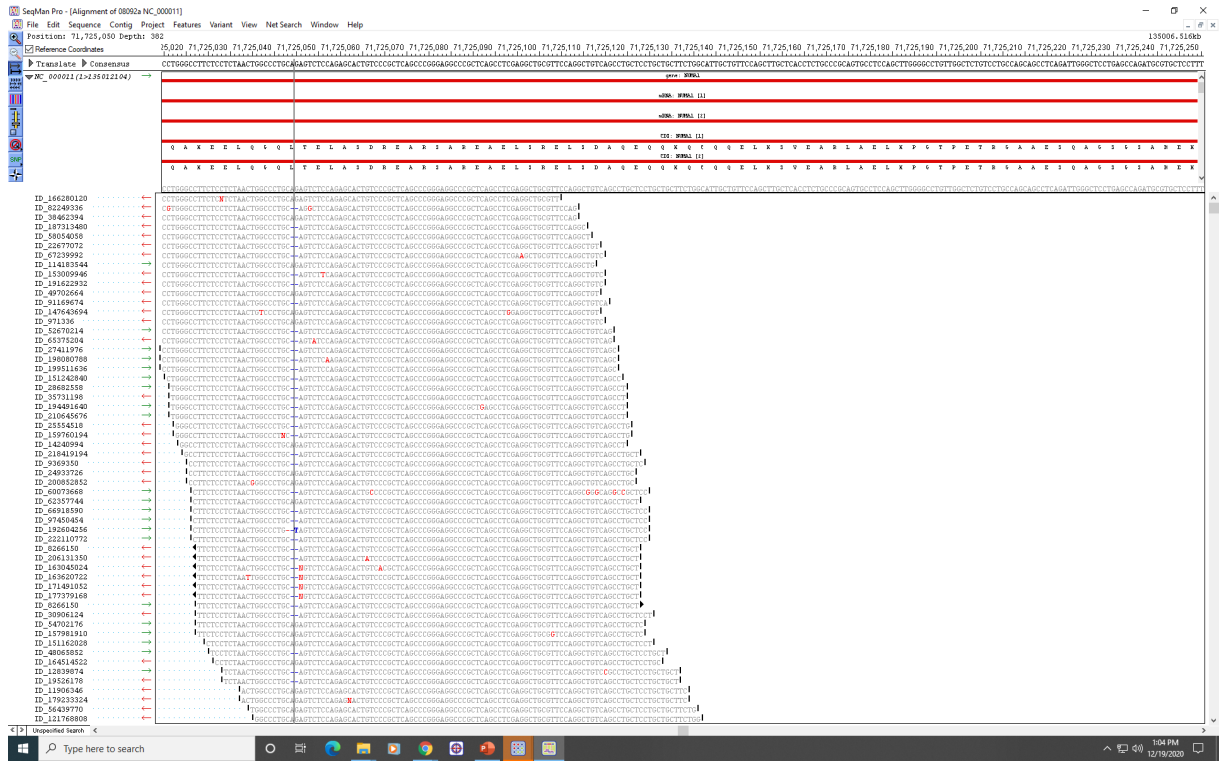

### Cell line:

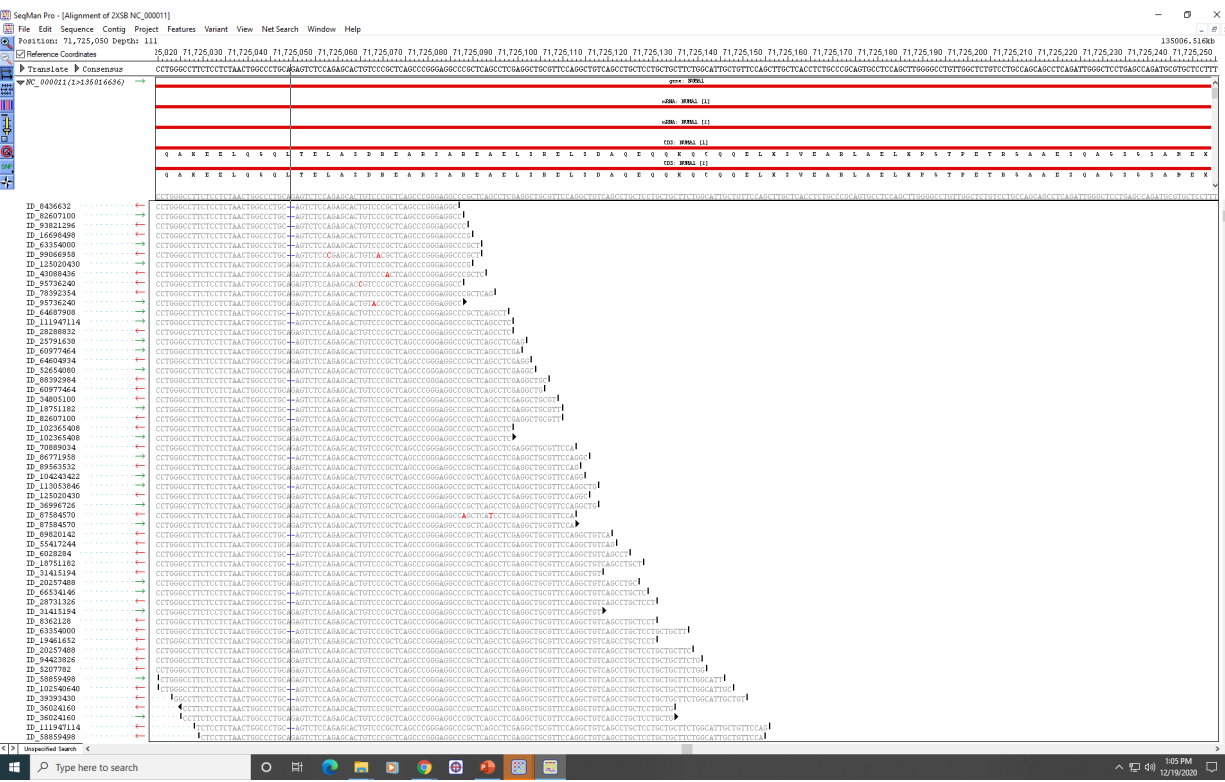



# Supplemental Figure S7

## WES assembly output: PDE11A, p.P434L

### Tumor:

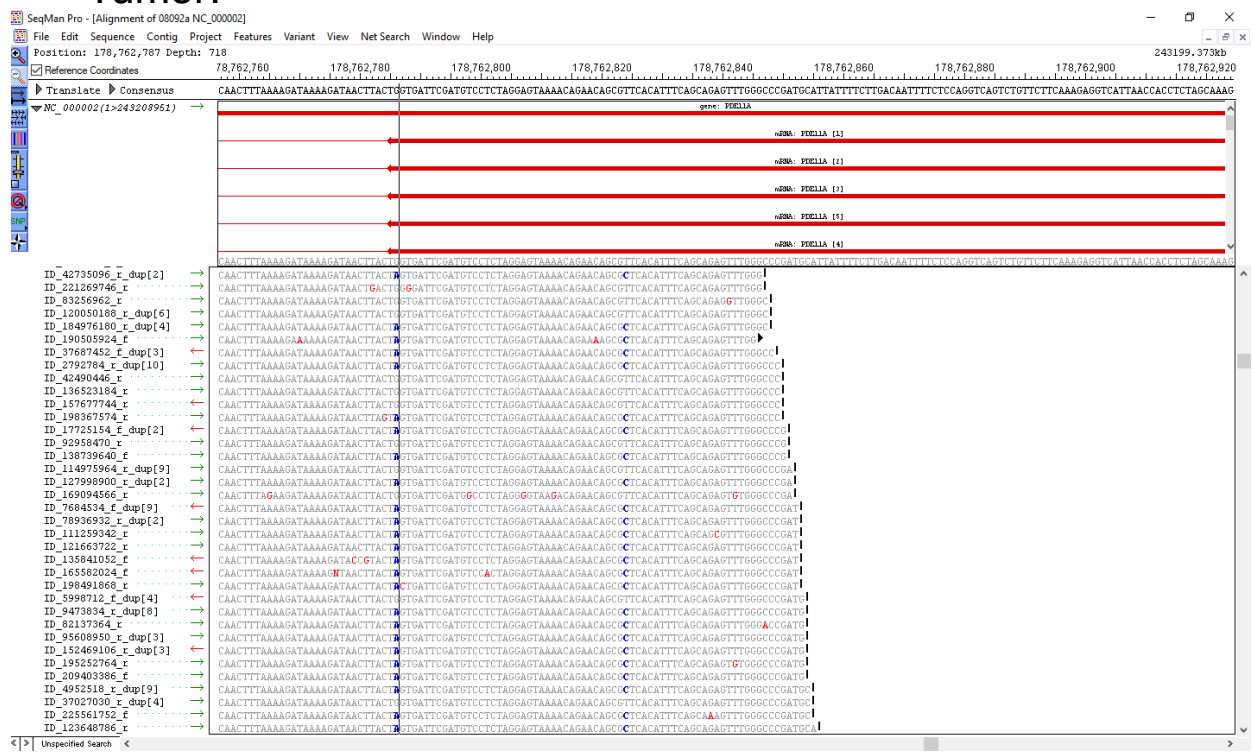

### Cell line:

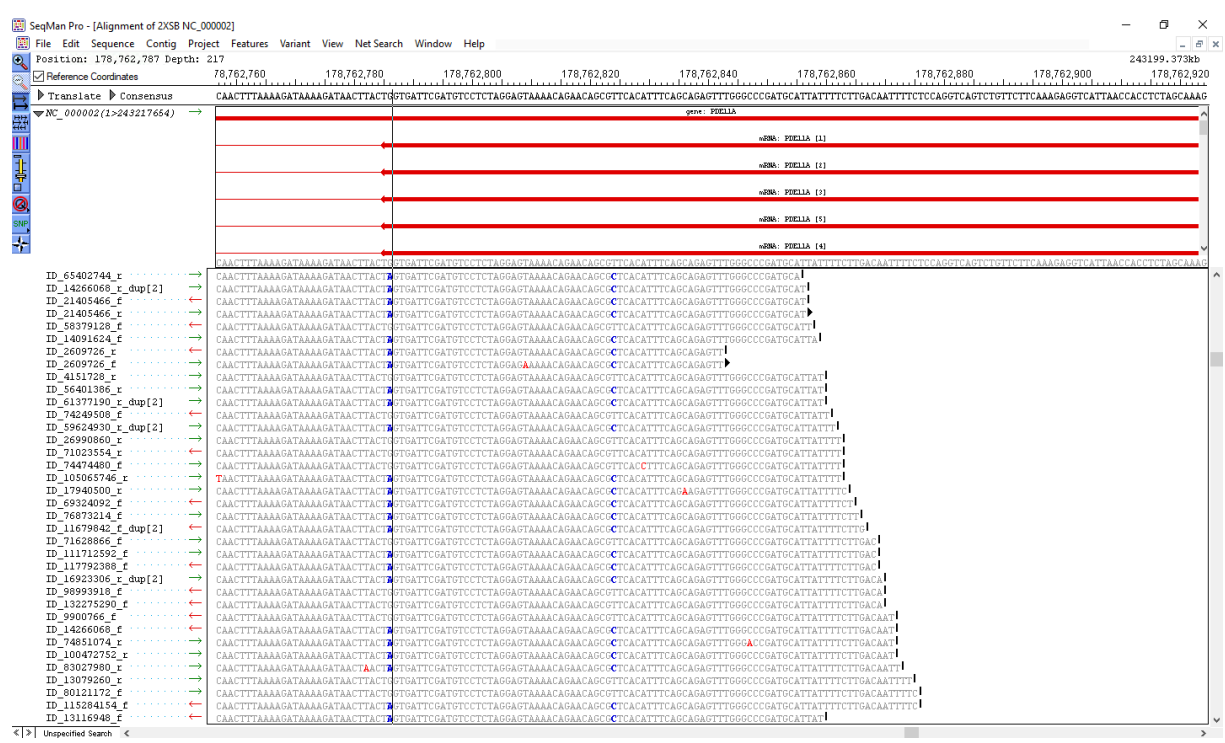

Supplemental Figure S7

WES assembly output: BRAF, p.V600E

Tumor:

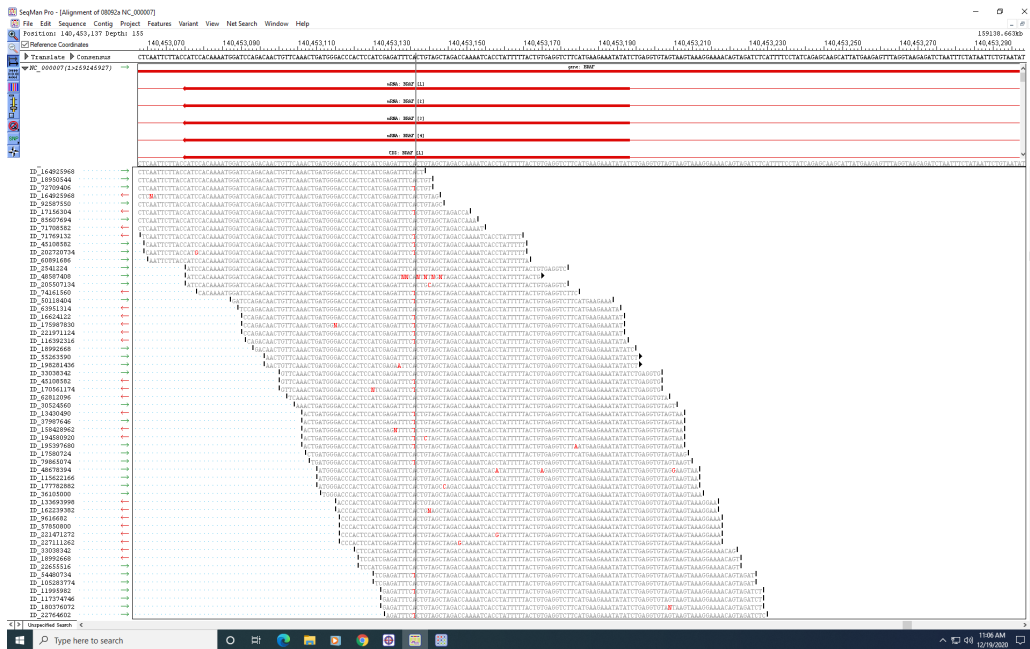

Cell line:

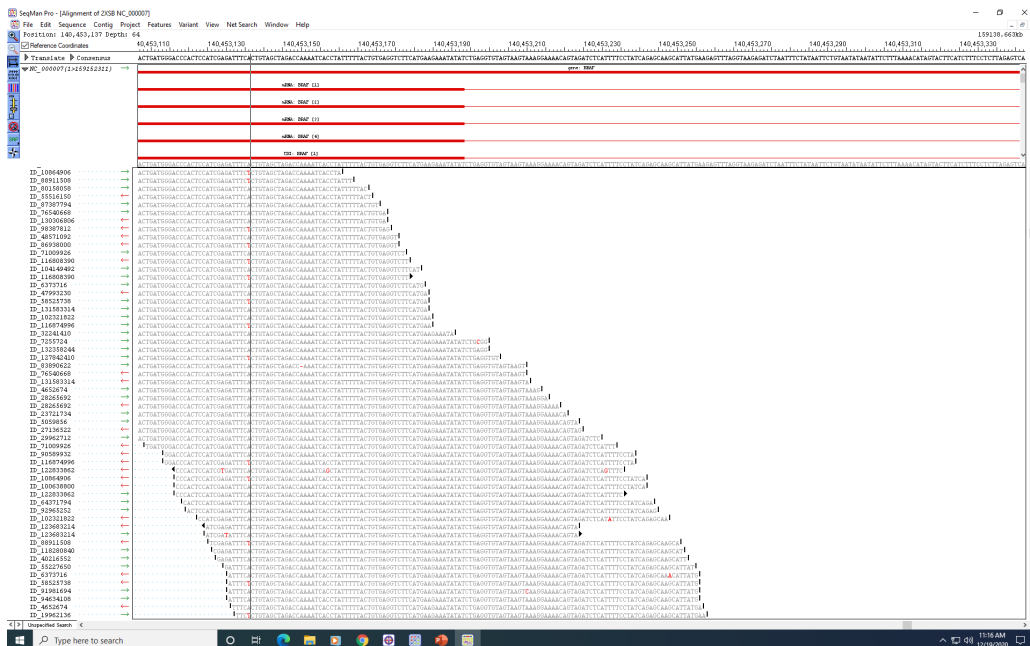



# Supplemental Figure S7

## WES assembly output: LRP5, p.R428\*

### Tumor:

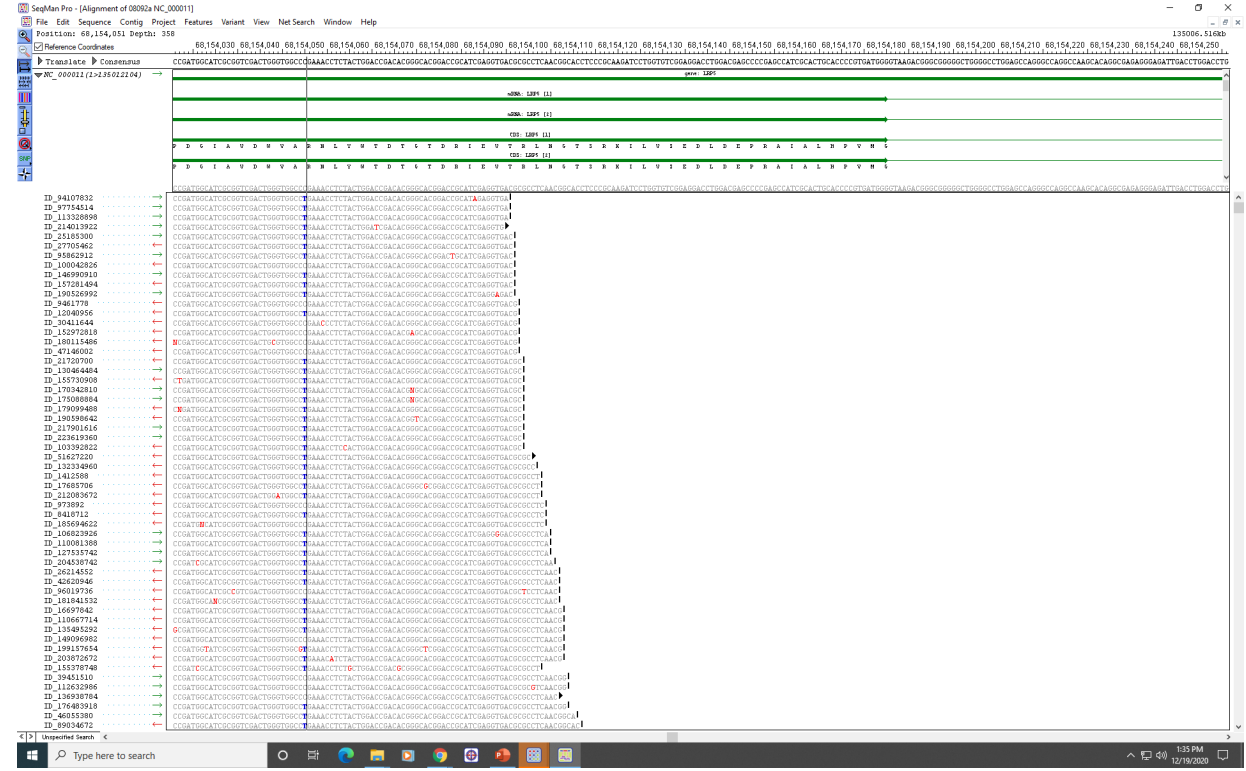

### Cell line:

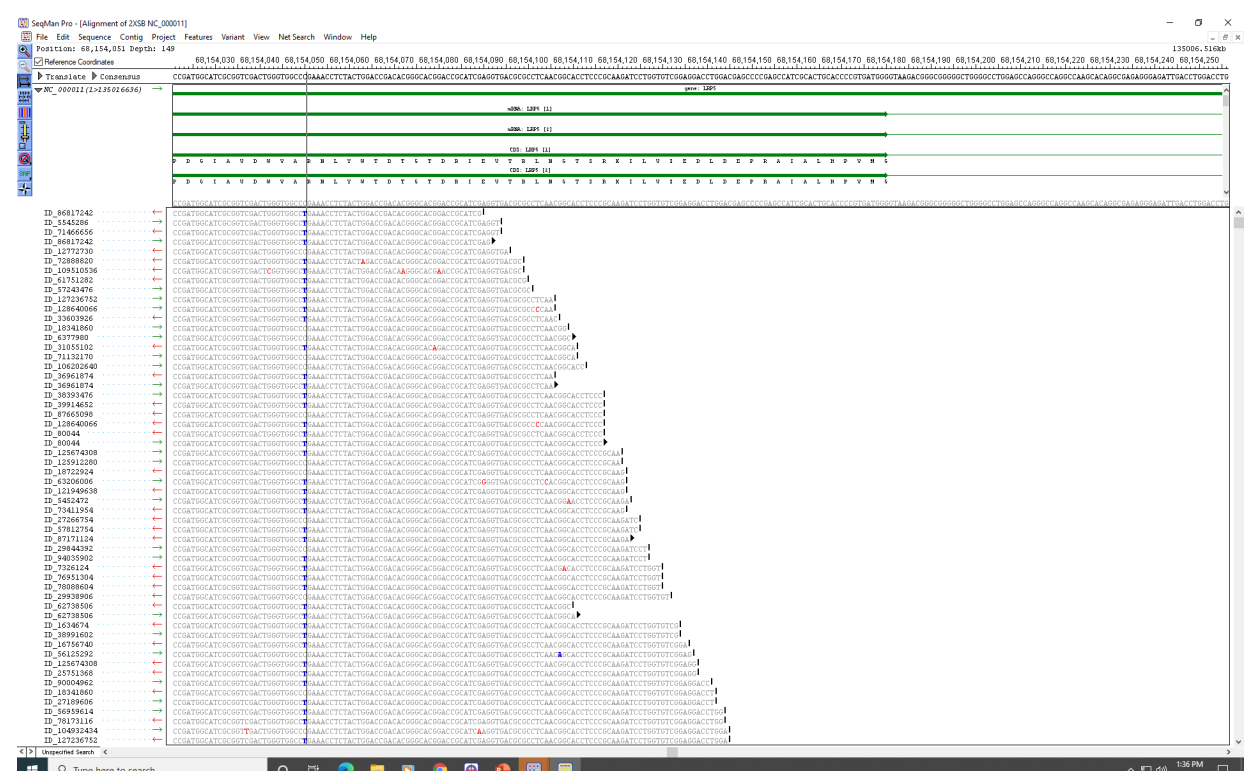



# Supplemental Figure S7

## WES assembly output: ACTL9, p.Q12\*

### Tumor:

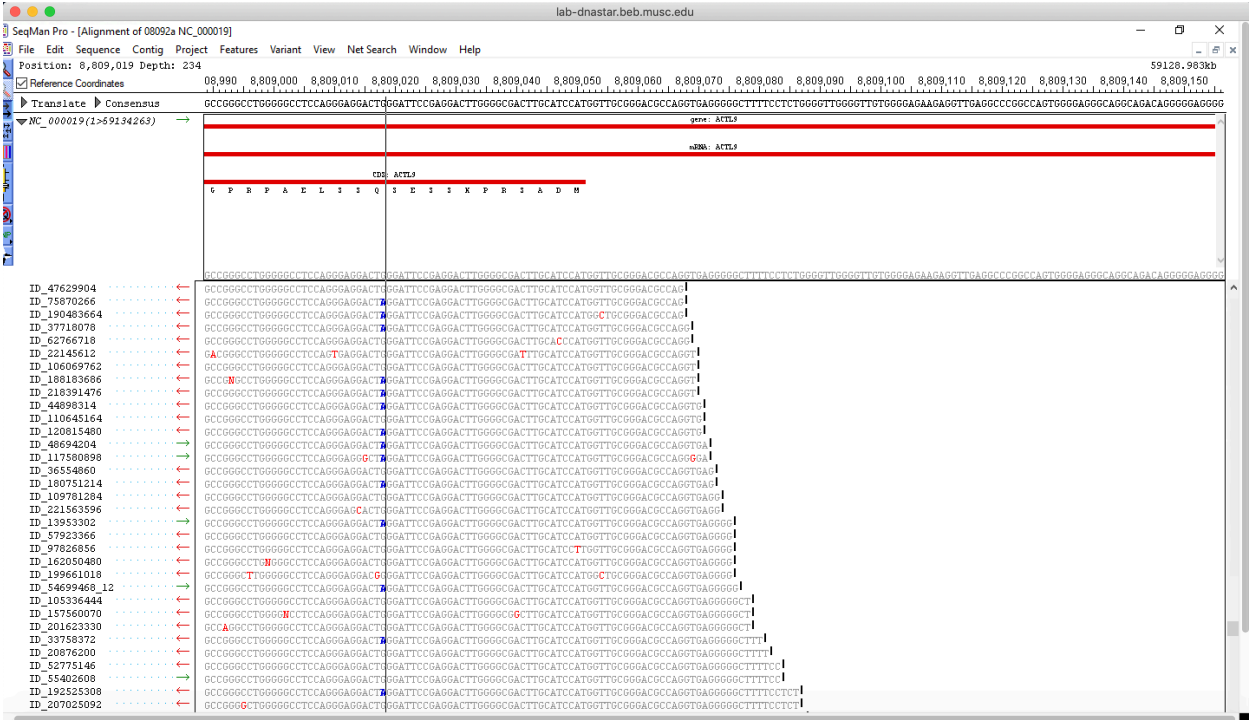

### Cell line:

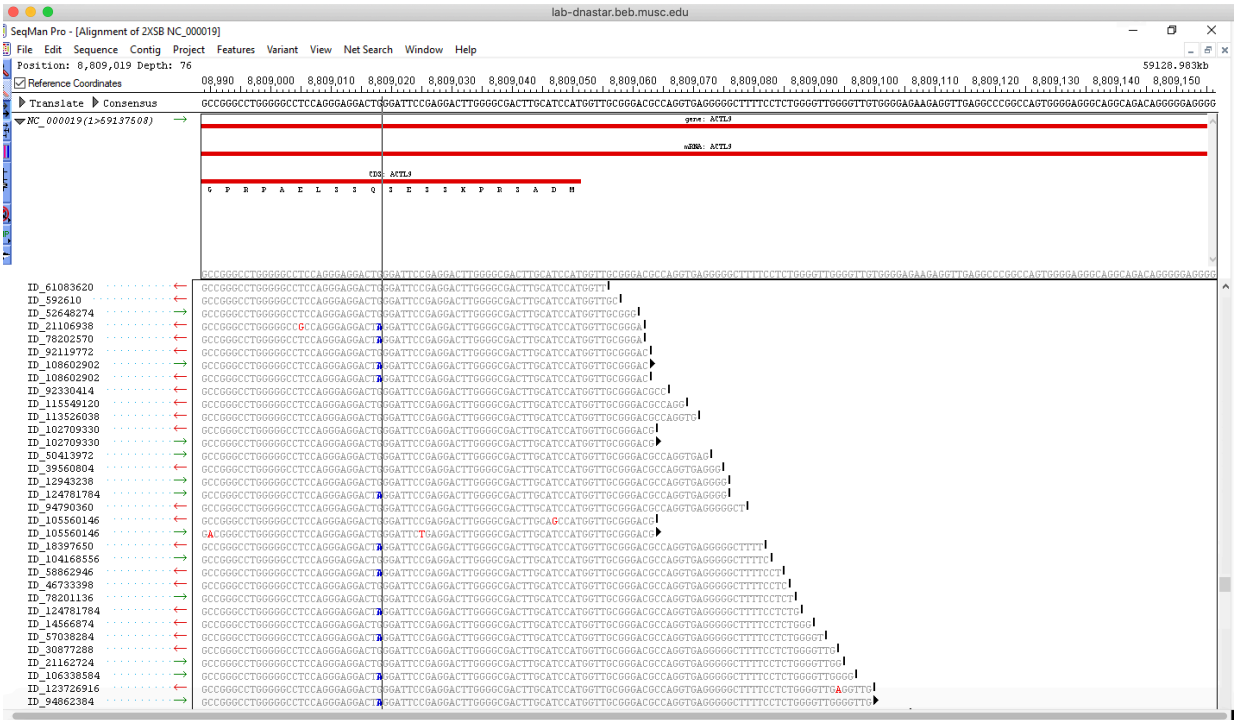

# Supplemental Figure S8a

## Sanger Sequencing TERT Promoter Mutational Analysis, Schematic

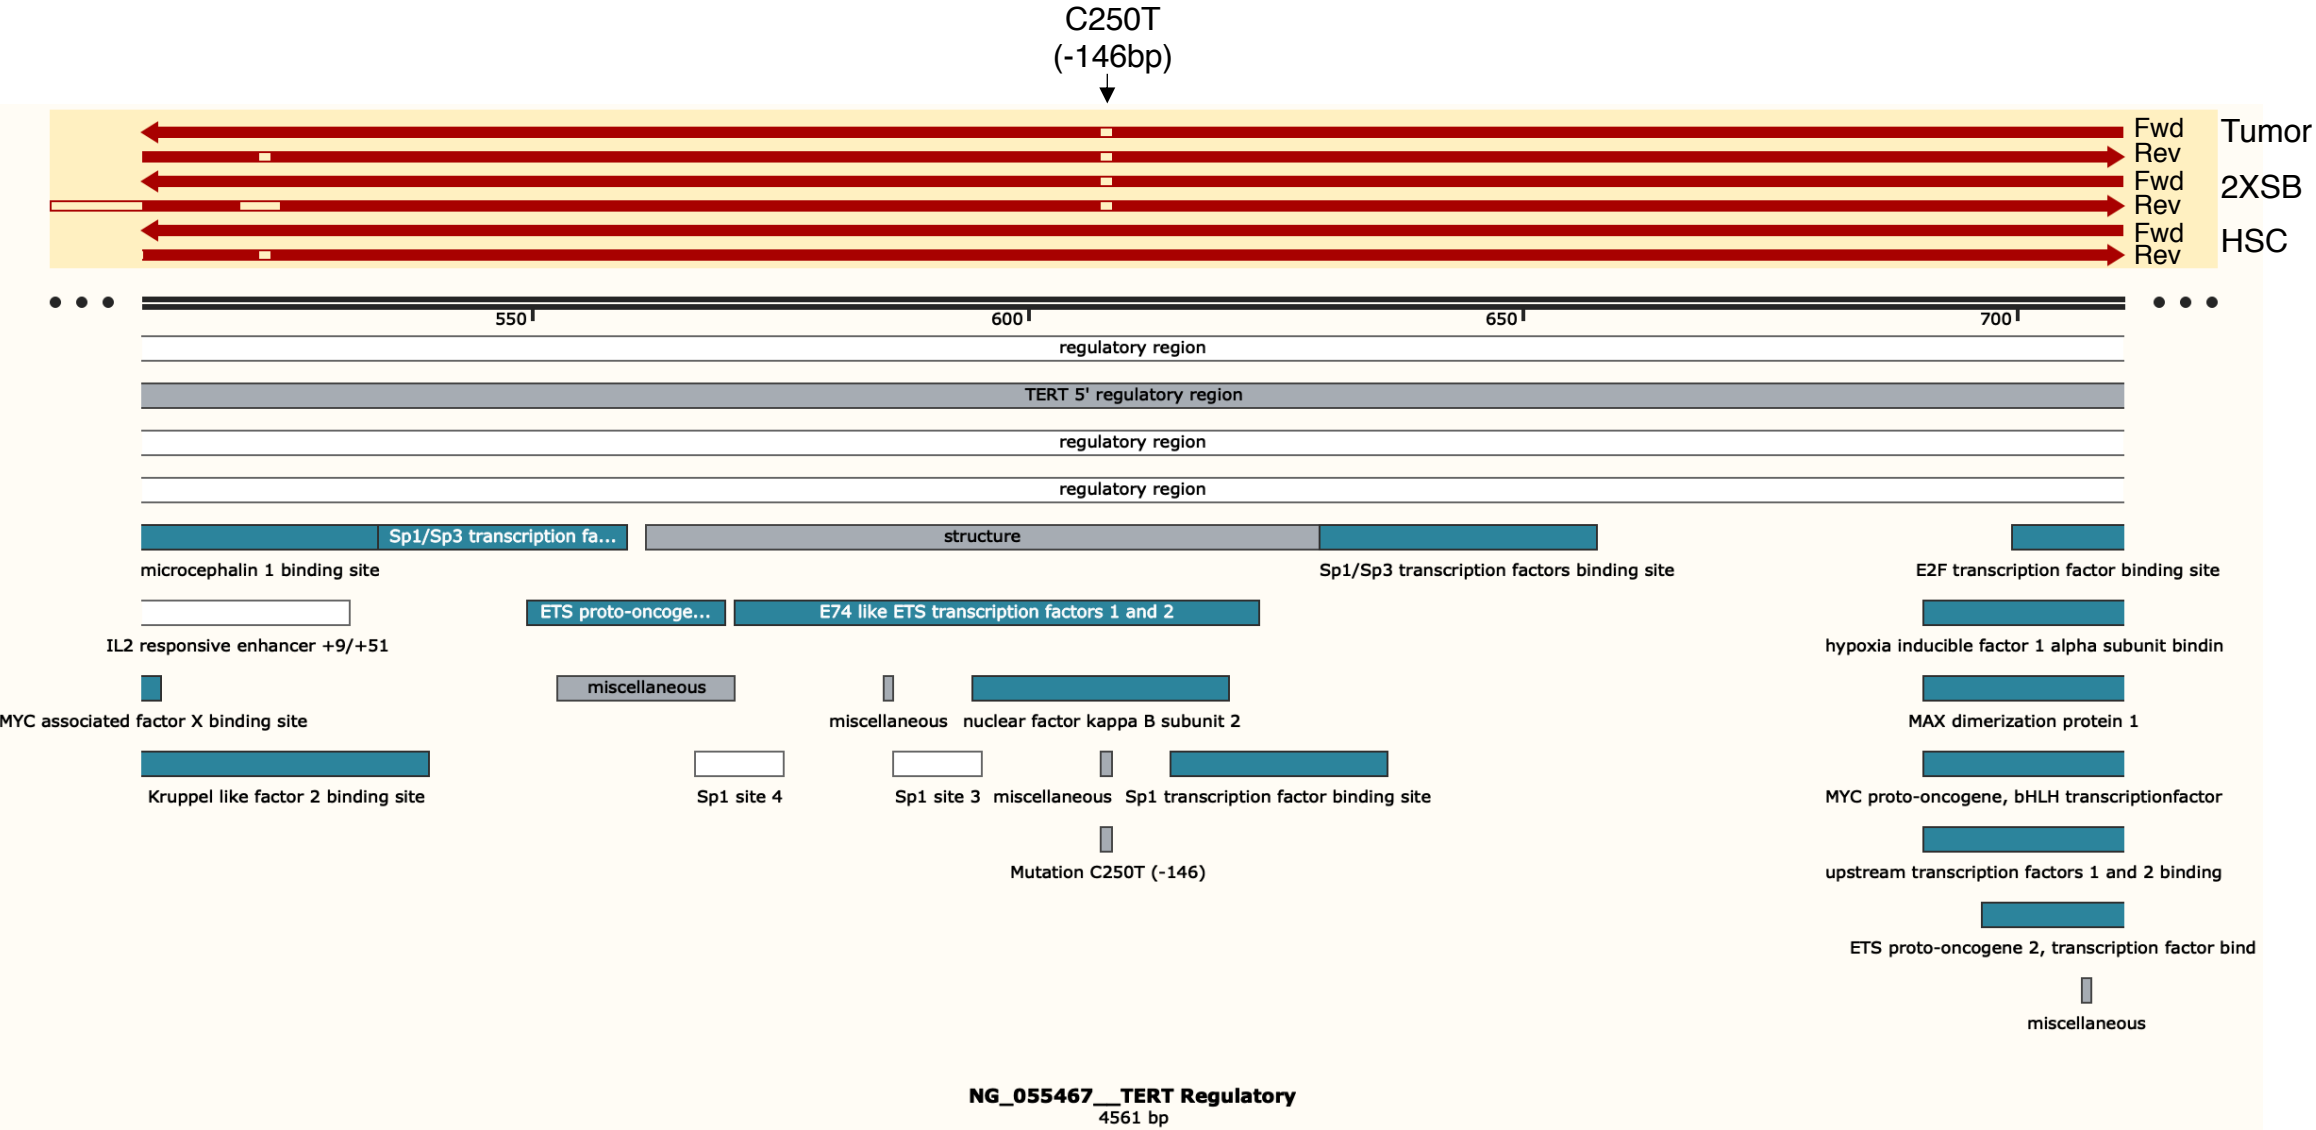

# Supplemental Figure S8b

## Sanger Sequencing TERT Promoter Mutational Analysis, Sequence

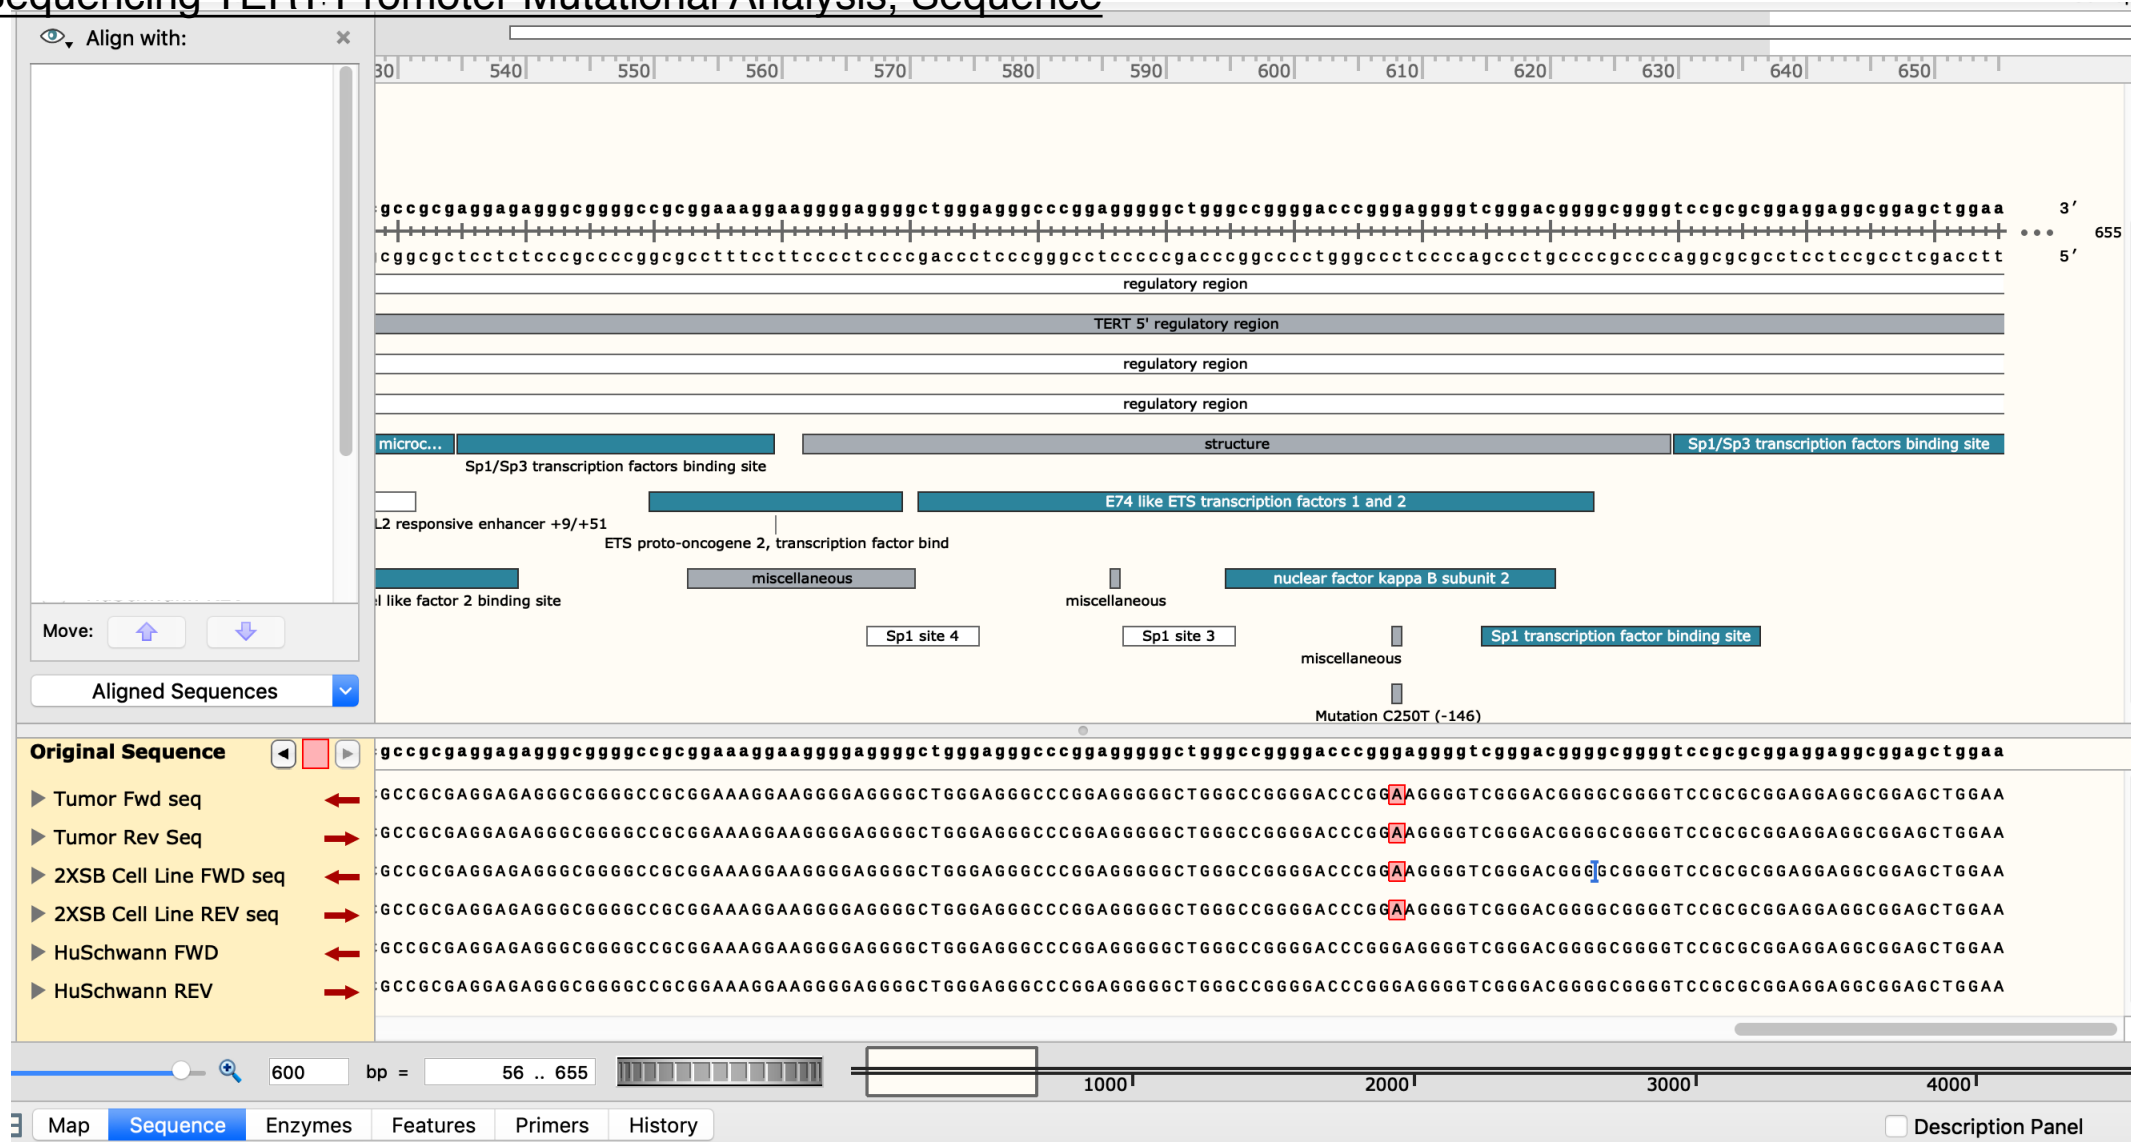

↓  
C250T  
(-146bp)

Supplemental Figure S8c

Sanger Sequencing TERT Promoter Mutational Analysis, Other MPNST Lines, Schematic

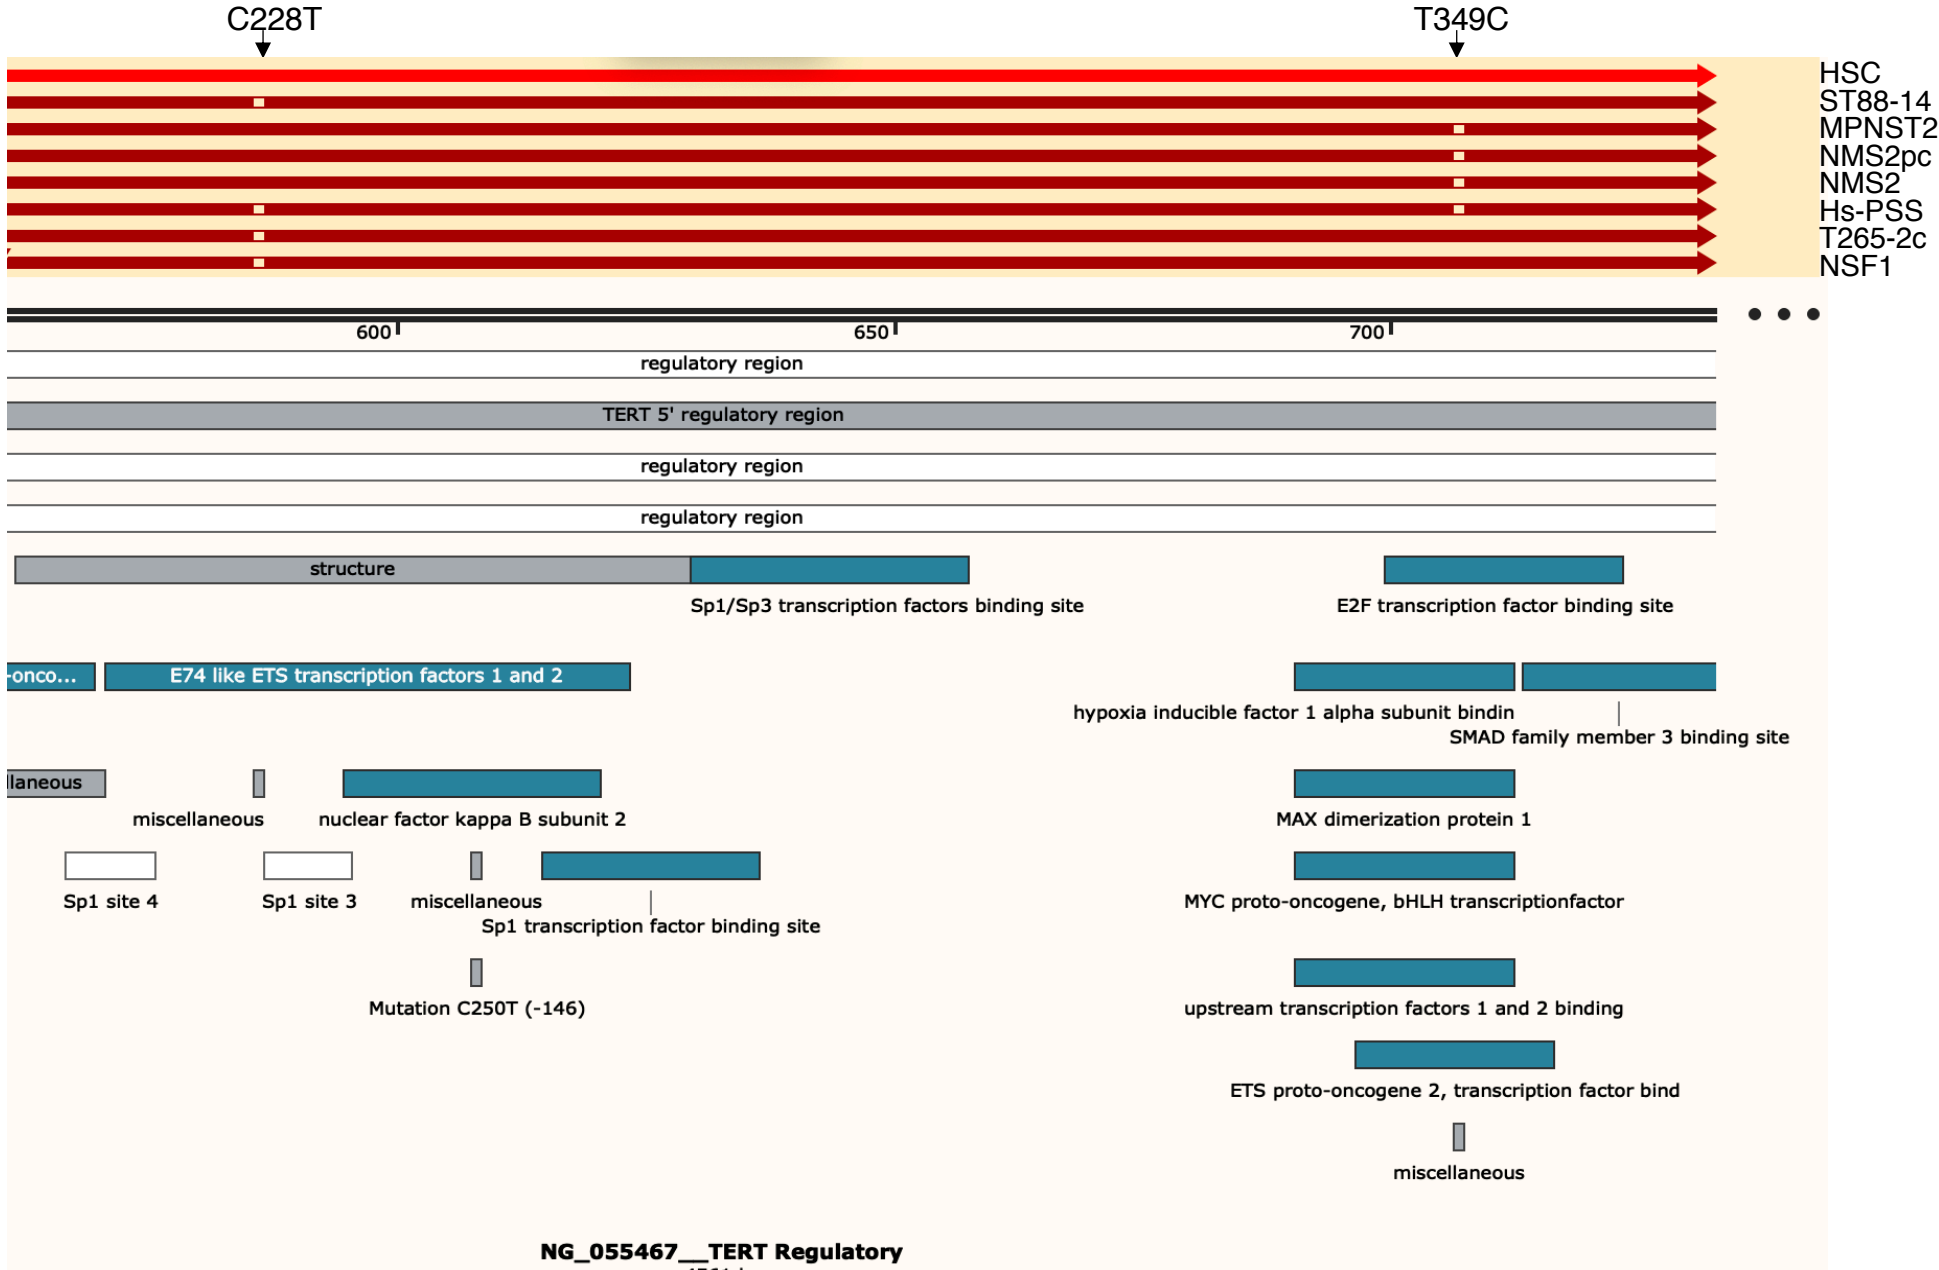

# Supplemental Figure S8d

## Sanger Sequencing TERT Promoter Mutational Analysis, Other MPNST Lines, Sequence

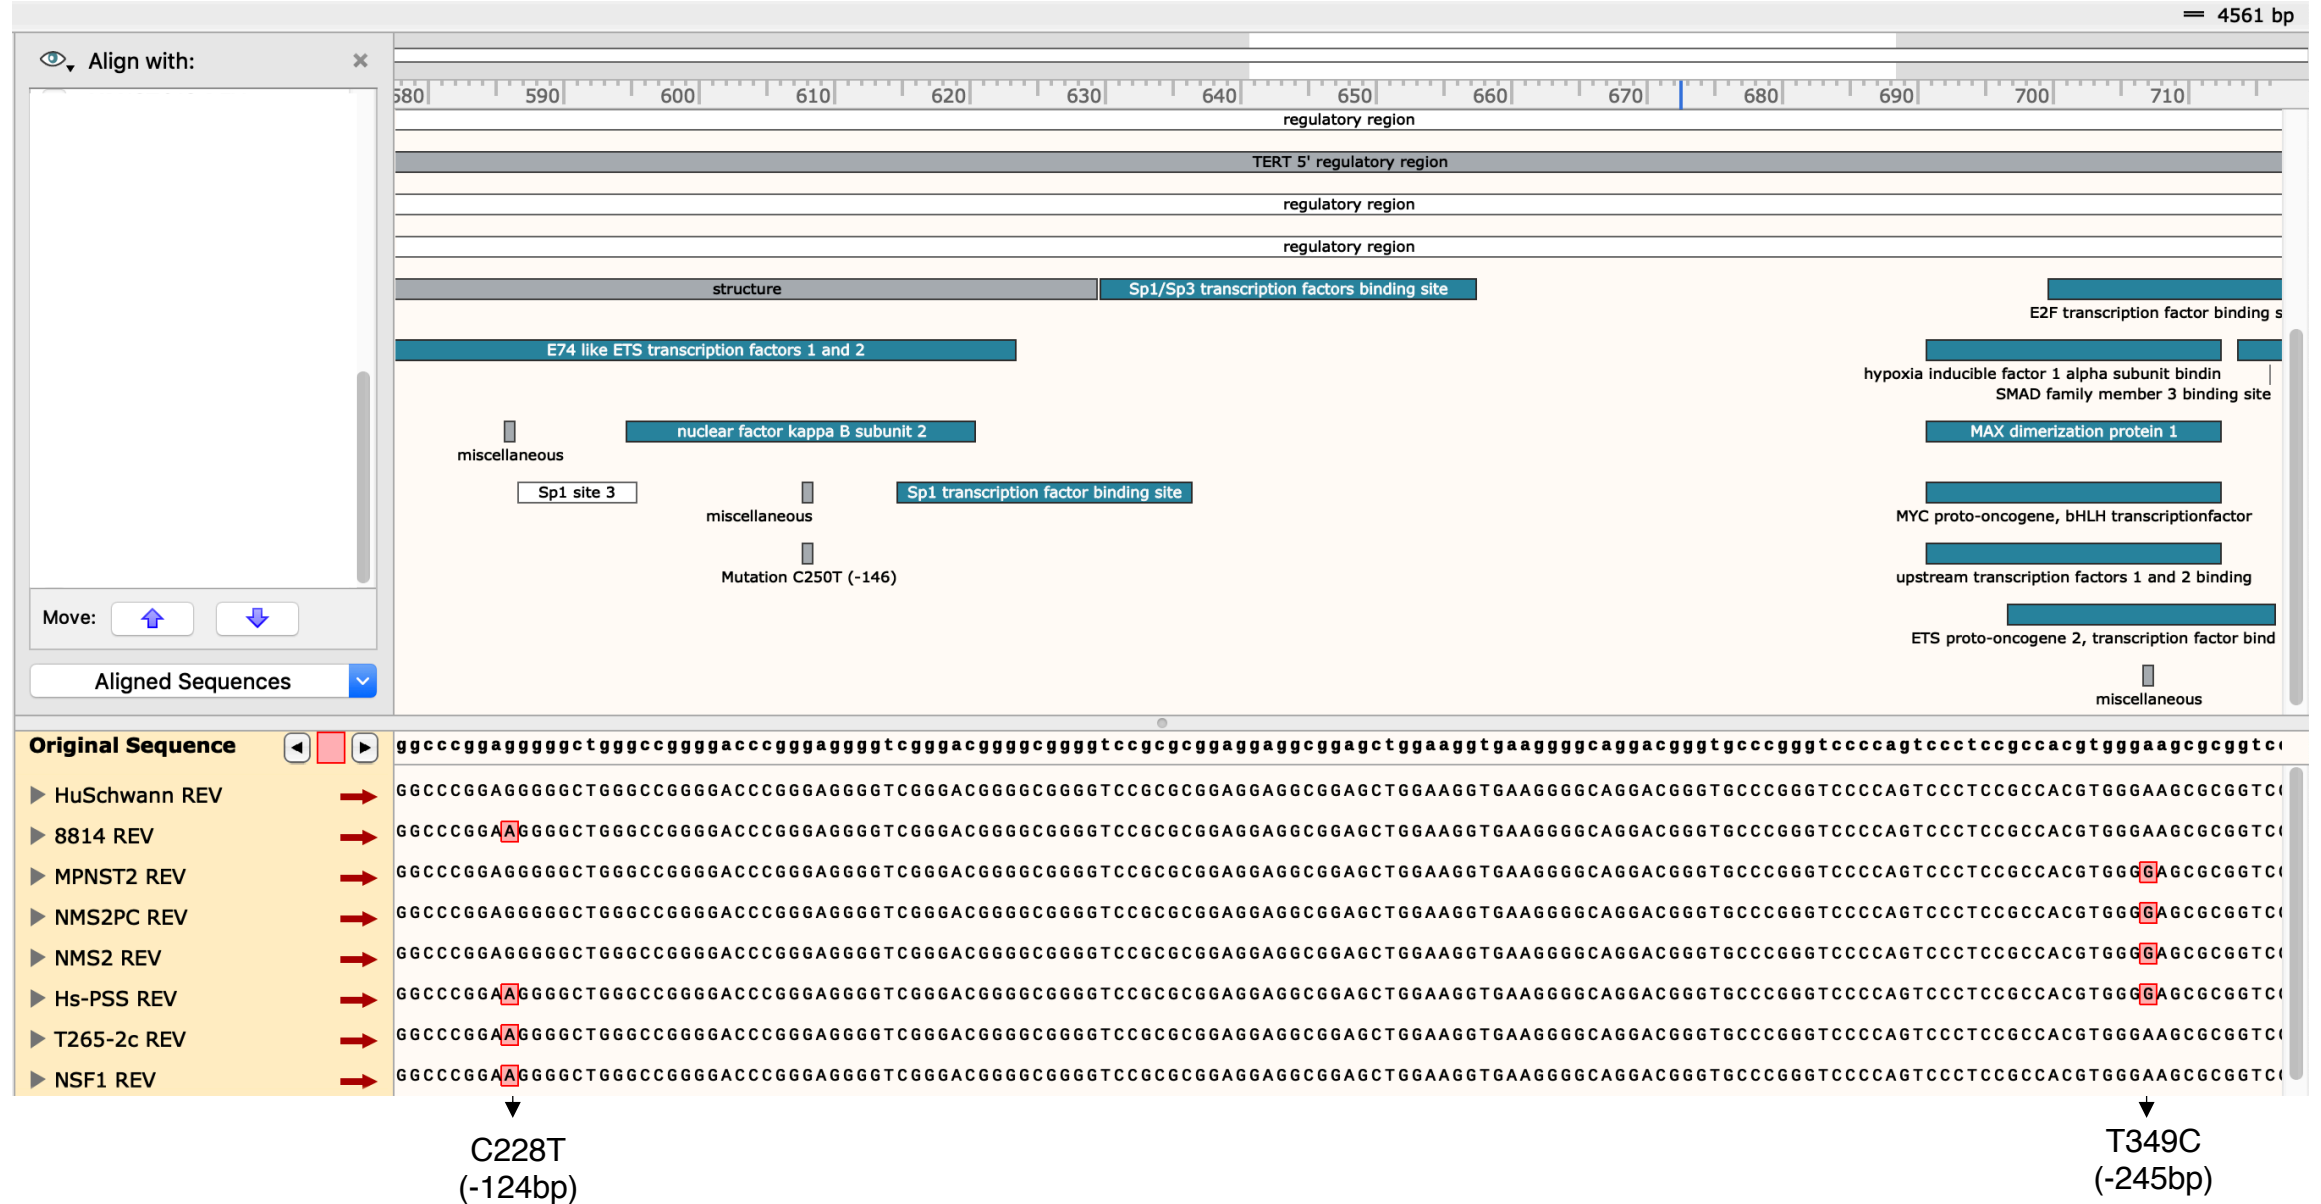

Supplemental Figure S9, Raw Images for western blots

Raf PD, NF1 immunoblot

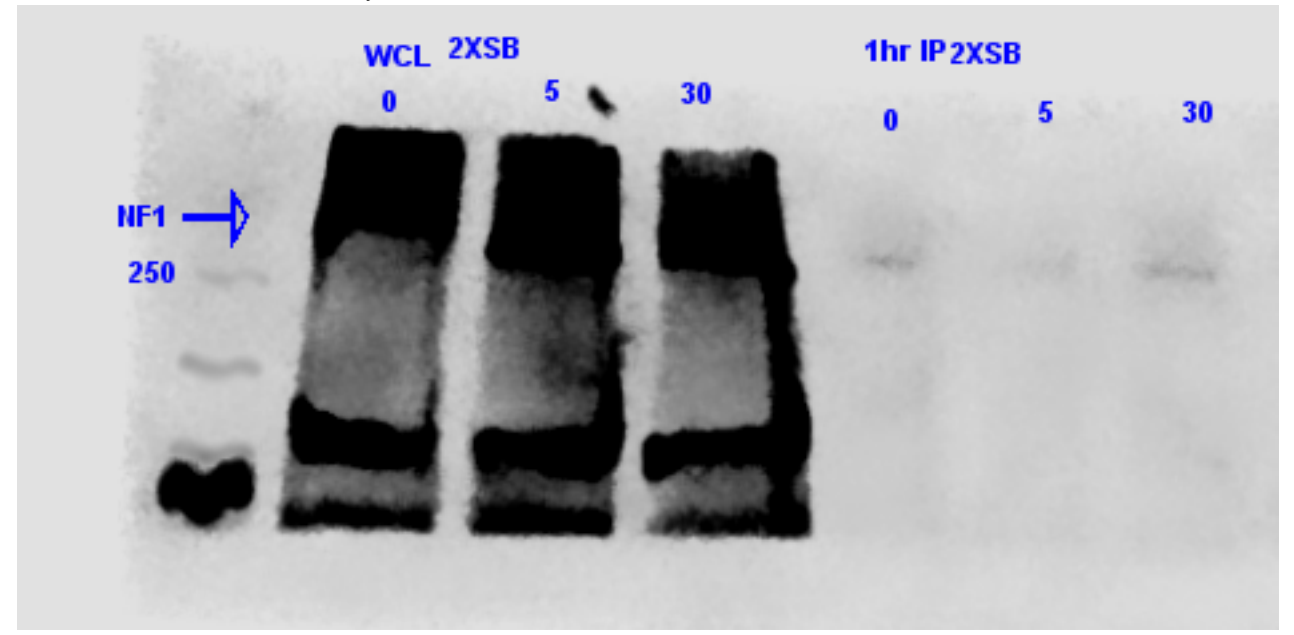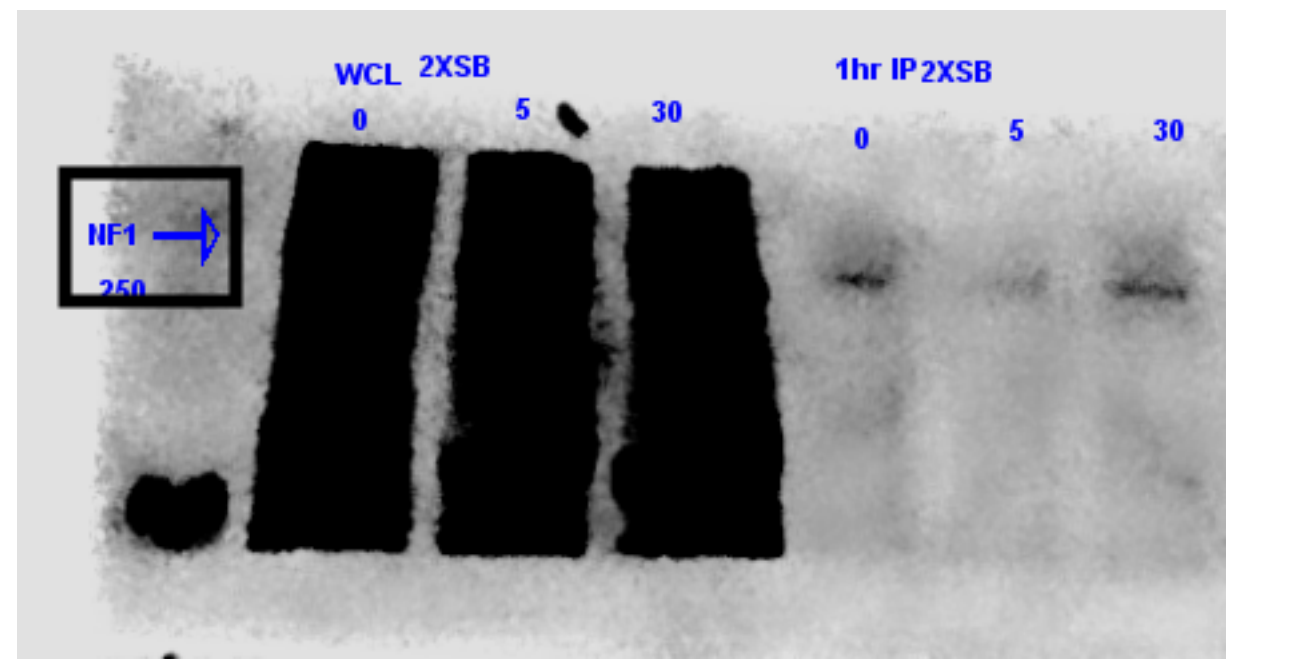

Supplemental Figure S9, Raw Images for western blots

Raf PD, Ras immunoblot

Light

Dark

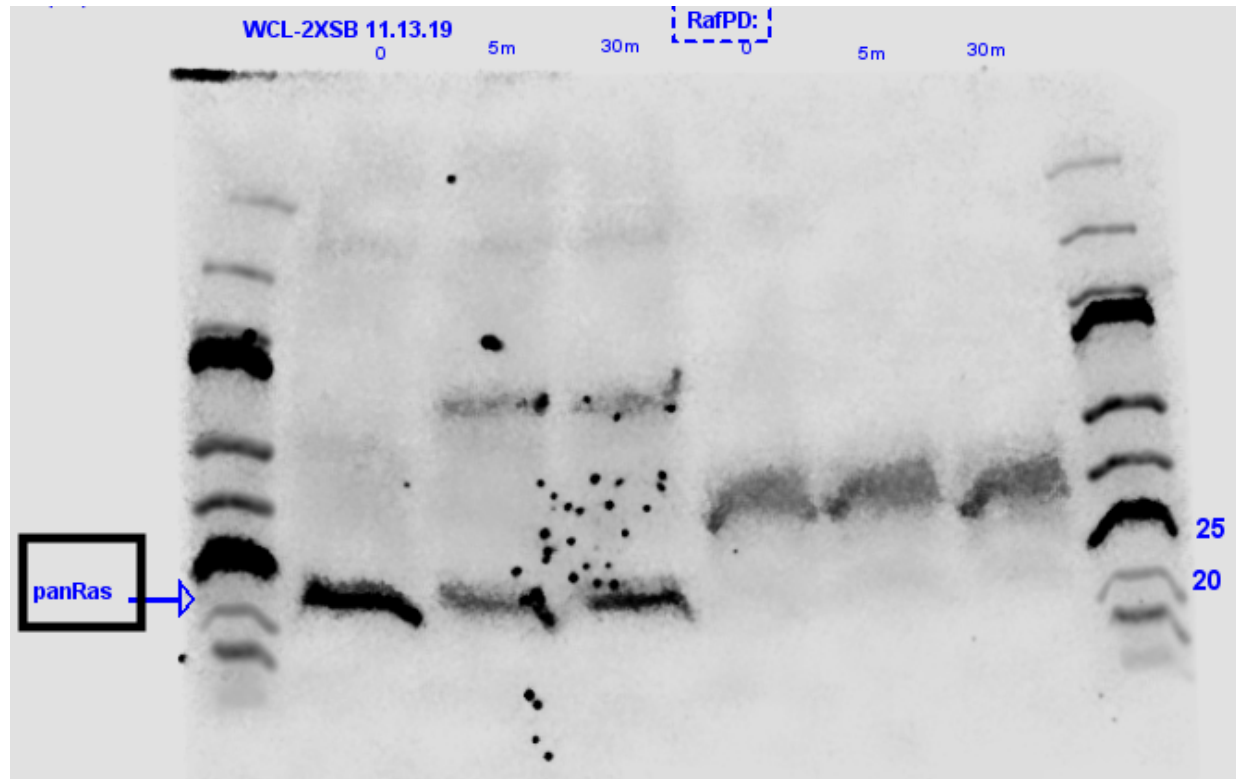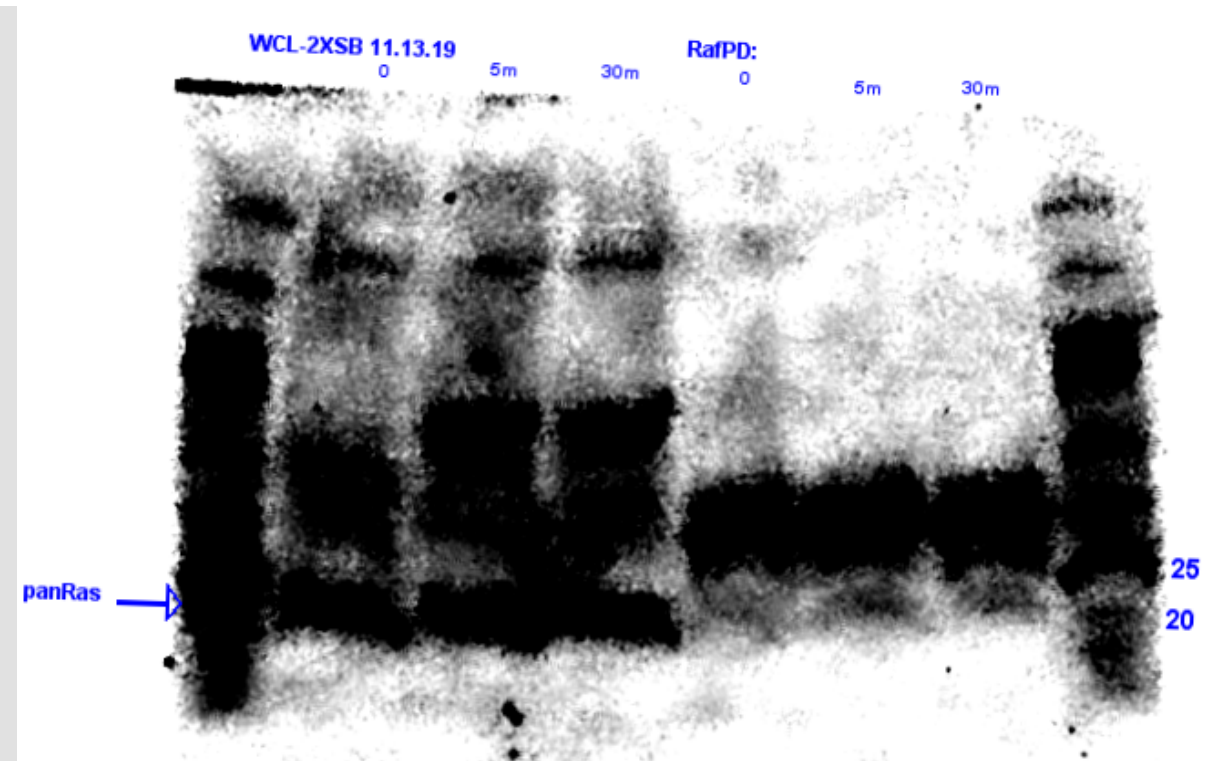

Supplemental Figure S9, Raw Images for western blots

Raf PD, CRAF, ERK immunoblot

dark

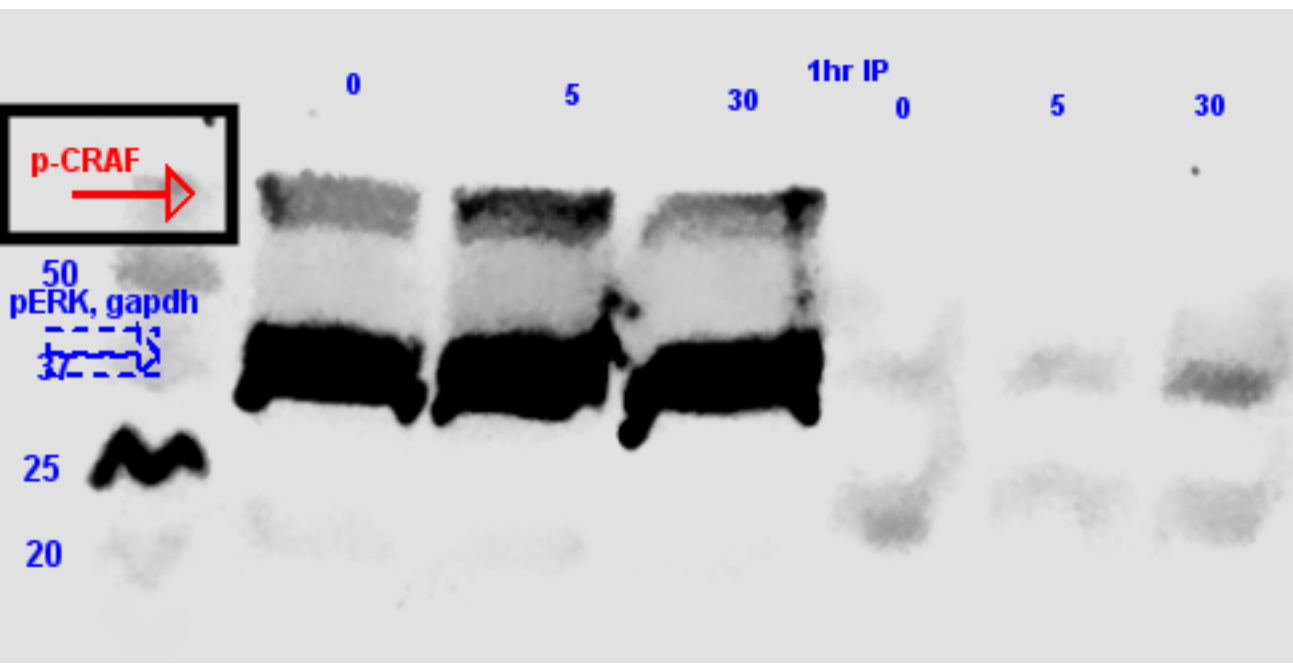

light

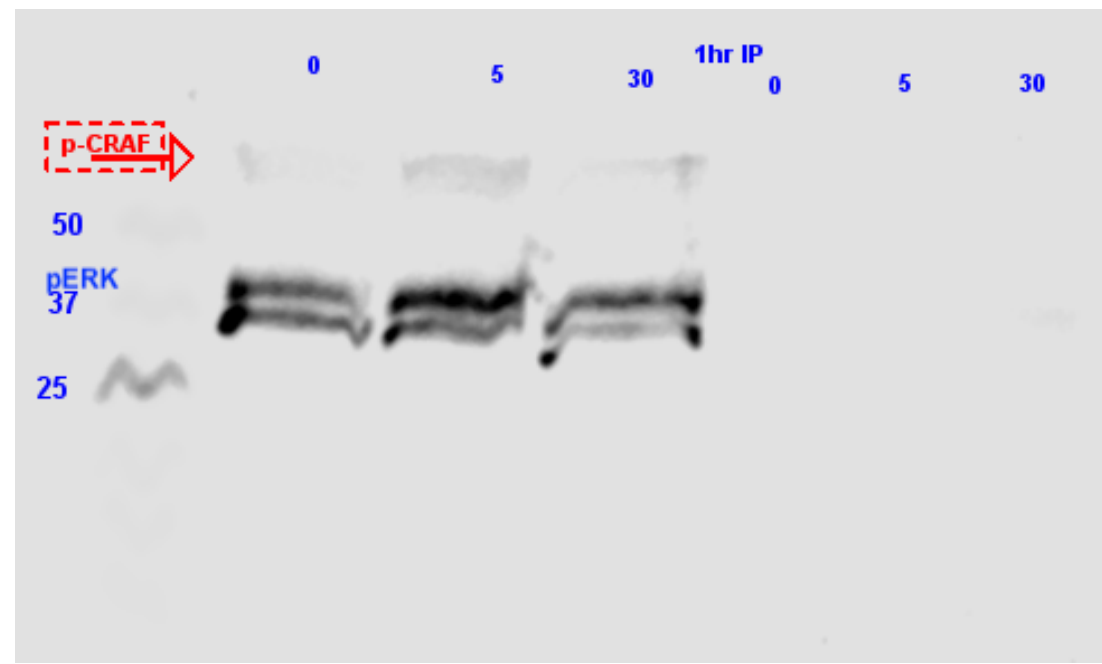



Supplemental Figure S9, Raw Images for western blots

Raf PD, gapdh immunoblot

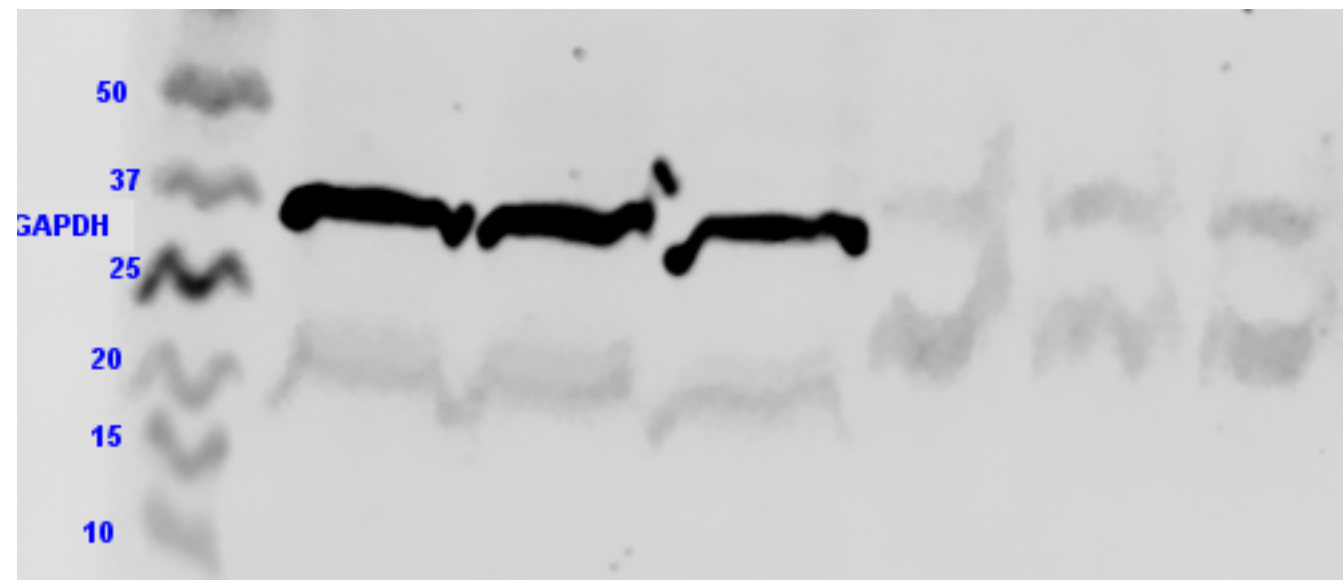

dark

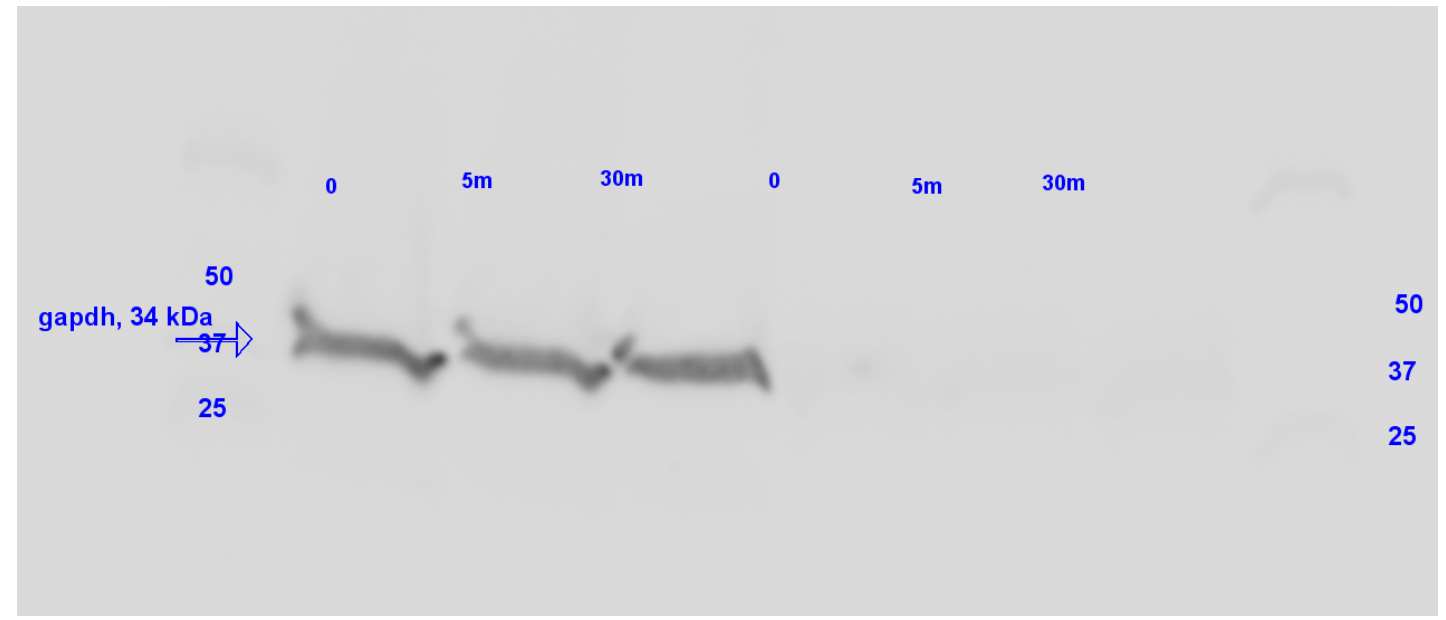

light

Supplemental Figure S9, Raw Images for western blots

Raf PD, total ERK immunoblot

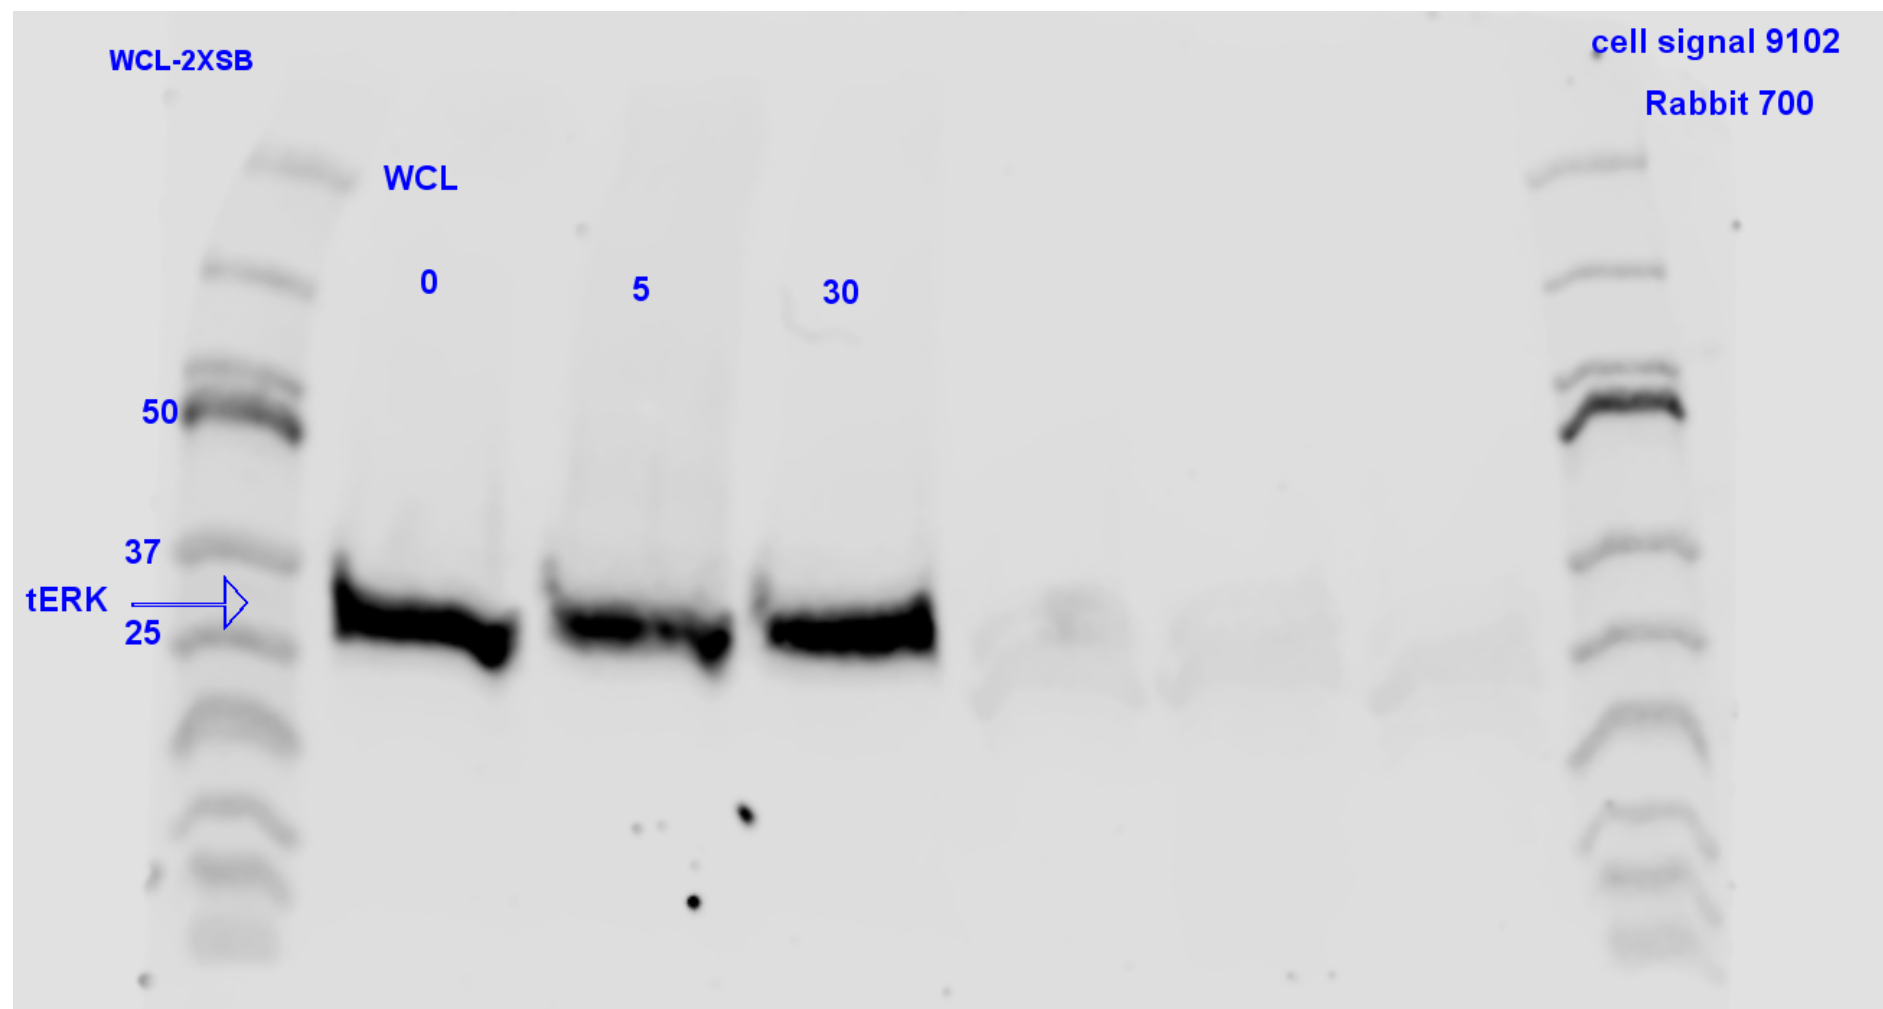

Supplement: 41598_2021_85055_MOESM8_ESM.pdf [file 41598_2021_85055_MOESM8_ESM.pdf]
